# Supplementary material for: Regioselective electrophilic aromatic borylation as a method for synthesising sterically hindered benzothiadiazole fluorophores
Source: Royal Society of Chemistry journal article supplement (doi:10.1039/d2ra08319a), 2023-01-01
Supplement: d2ra08319a1.pdf [file d2ra08319a1.pdf]

# Regioselective Electrophilic Aromatic Borylation as a Method for Synthesising Sterically Hindered Benzothiadiazole Fluorophores

## Electronic Supplementary Information

Dominic Taylor,<sup>a</sup> Thomas Malcomson,<sup>b</sup> Adilet Zhakeyev,<sup>c</sup> Georgina M. Rosair,<sup>a</sup> Martin J. Paterson,<sup>a</sup> Jose Marques-Hueso,<sup>c</sup> Scott. J. Dalgarno<sup>a,\*</sup> and Filipe Vilela<sup>a,\*</sup>

<sup>a</sup>School of Engineering and Physical Sciences, Heriot-Watt University, Riccarton, Edinburgh, EH14 4AS, UK.

<sup>b</sup>Department of Chemistry, Lancaster University, Lancaster, LA1 4YB, UK.

<sup>c</sup>Institute of Sensors, Signals and Systems, School of Engineering and Physical Science, Heriot-Watt University, Riccarton, Edinburgh, EH14 4AS, UK.

E-mail: [f.vilela@hw.ac.uk](mailto:f.vilela@hw.ac.uk), [s.j.dalgarno@hw.ac.uk](mailto:s.j.dalgarno@hw.ac.uk)

## Table of Contents

---

|           |                                                                                    |           |
|-----------|------------------------------------------------------------------------------------|-----------|
| <b>1.</b> | <b>General Experimental Details</b>                                                | <b>2</b>  |
| <b>2.</b> | <b>Synthetic Details</b>                                                           | <b>3</b>  |
| 2.1       | Synthesis of Starting Materials                                                    | 3         |
| 2.2       | Synthesis of <b>BTZ</b> Fluorophores                                               | 4         |
| <b>3.</b> | <b>Single Crystal X-Ray Structures</b>                                             | <b>9</b>  |
| <b>4.</b> | <b>Photophysical Properties of the Fluorophores</b>                                | <b>13</b> |
| 4.1       | UV-Vis Absorption and Emission Spectra                                             | 13        |
| 4.2       | Molar Attenuation Coefficient Measurements                                         | 17        |
| 4.3       | Absolute Photoluminescence Quantum Yield and<br>Fluorescence Lifetime Measurements | 17        |
| 4.4       | Estimation of Radiative and Non-radiative Relaxation Rate<br>Constants             | 19        |
| <b>5.</b> | <b>Computational Studies</b>                                                       | <b>20</b> |
| 5.1       | General Information                                                                | 20        |
| 5.2       | Theoretical Absorption Spectra                                                     | 23        |
| 5.3       | Excited State Orbitals                                                             | 24        |
| 5.4       | Energy Barriers to Bond Rotation                                                   | 30        |
| <b>6.</b> | <b>Characterisation of Products</b>                                                | <b>31</b> |
| <b>7.</b> | <b>References</b>                                                                  | <b>45</b> |

## 1. General Experimental Details

All commercially available compounds were used as received and purchased from Sigma-Aldrich, Fluorochem, Apollo Scientific or Fischer Scientific. Where stated, reactions were carried out under an atmosphere of oxygen free nitrogen purchased from BOC using oven dried glassware. Column chromatography was performed using Silicagel 60 Å 40 – 63 microns from Fluorochem. Thin layer chromatography was run using Silica gel 60 F254 TLC plates and the spots were visualised using UV illumination.

NMR spectra of synthetic products were recorded using a Bruker AVIII 300 MHz spectrometer using the residual solvent peak as an internal reference. All IR spectra were recorded on solid powder/crystals using a Nicolet™ iS™ 5 FTIR spectrometer. UV-Vis absorption spectra for the synthesised fluorophores were obtained using a Perkin-Elmer Lambda 35 spectrometer in chloroform solution in quartz cuvettes with a path length of 1 cm. Emission spectra in the visible region were recorded using a Perkin Elmer LS 55 fluorescence spectrometer in chloroform solution using quartz cuvettes with a path length of 1 cm. The excitation wavelength used was the wavelength of maximum absorption for each individual fluorophore. For comparison between different spectra, each set of data was normalised to the maximum absorbance observed in the region of 350 – 800 nm.

PLQYs measurements were obtained following the conventions and considerations from Jones et al.,<sup>1</sup> using a FLS920 spectrofluorometer (Edinburgh Instruments Ltd) equipped with an extended red-sensitive photon multiplier detector (R2658P, Hamamatsu) and an integrating sphere with a 102 mm inner diameter (Yobin Yvon) were used for all PLQY measurements. For the excitation, a 450 W Xenon lamp (Xe2, Edinburgh Instruments Ltd) was employed. The samples consisting of 20 µM fluorophores diluted in CHCl<sub>3</sub>, were contained in a square quartz cuvette with a path length of 1 cm and placed in the centre of the integrating sphere. Pure CHCl<sub>3</sub> was used as reference. The excitation wavelengths were set to the peak absorption of each sample with a bandwidth set to 5 nm. The excitation and emission regions were measured with a 0.25 nm step size. The associated measurement error is 3%.

Lifetimes measurements were performed using the FLS920 spectrofluorometer, equipped with time-correlated single photon counting (TCSPC) electronics, and a pulsed light emitting diode (EPLED, from Edinburgh Instruments). The 405 nm excitation has an optical pulse approximately 1 ns long. The collection was recorded at the highest intensity emission, and the decay was fit with a single exponential.

Single crystal x-ray structures were collected using a Bruker D8 venture using a Cu-K<sub>α</sub> ( $\lambda = 1.5418 \text{ \AA}$ ) I $\mu$ S 3.0 microfocus source, using the APEX3 program suite, with the crystal kept at 100.0 K during data collection. The structures were solved using Olex2, using the SHELXT structure solution program using Intrinsic Phasing and refined with the SHELXL refinement package using Least Squares minimisation.<sup>2-4</sup>

## 2. Synthetic Details

### 2.1 Synthesis of Starting Materials

#### Tetrakis(triphenylphosphine) palladium (0)<sup>5</sup>

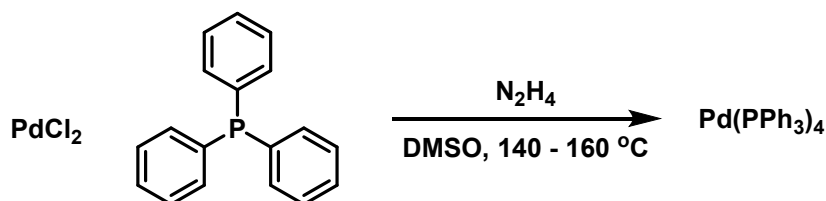

A dry, 250 mL 2-neck flask was charged with triphenylphosphine (2.63 g, 10 mmol) and palladium (II) chloride (351 mg, 2 mmol), then connected to a Schlenk line, then evacuated and back-filled with nitrogen three times. The flask was then charged with anhydrous DMSO (25 mL) and rapidly evacuated and backfilled with nitrogen three times. The mixture was then heated to 140 – 160 °C under nitrogen until an orange solution formed, then stirring continued for 15 minutes. Hydrazine hydrate (50 – 60%, 0.6 mL) was added and the mixture removed from the heat and stirring stopped, then allowed to cool to room temperature and left to sit for approximately 1 hour. During this time, yellow crystals formed that were then filtered through a sintered glass adaptor under nitrogen. The crystals were then washed with dry methanol (5 x 15 mL) and dry diethyl ether (5 x 10 mL) and allowed to dry under nitrogen and vacuum. The crystals were then transferred to a dry round bottom flask, sealed with a septum then evacuated and backfilled with nitrogen five times. The final mass of dried crystals was 2.057 g (89%).

#### 4,7-Dibromobenzo[*c*][1,2,5]thiadiazole<sup>6</sup>

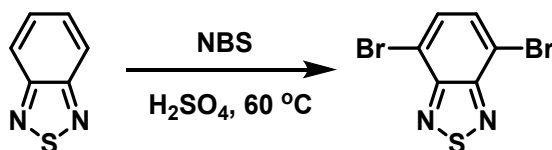

Benzo[*c*][1,2,5]thiadiazole (2.5 g, 18.4 mmol) and *N*-bromosuccinimide (NBS) (6.877 g, 38.64 mmol) were dissolved in concentrated sulfuric acid (25 mL) and the mixture heated to 60 °C for 4 hours. Following this, the reaction was allowed to cool to room temperature and then poured onto an ice-water mixture. The precipitate that formed was then filtered and washed with copious amounts of water. The final product was dried under vacuum to give an off-white powder (4.524 g, 85%). <sup>1</sup>H NMR (CDCl<sub>3</sub>, 300 MHz, 25.0 °C) δ<sub>H</sub> 7.73 (s, 2 H).

## 2.2 Synthesis of BTZ Fluorophores

### 4,7-Diphenylbenzo[*c*][1,2,5]thiadiazole (pH-BTZ)<sup>7</sup>

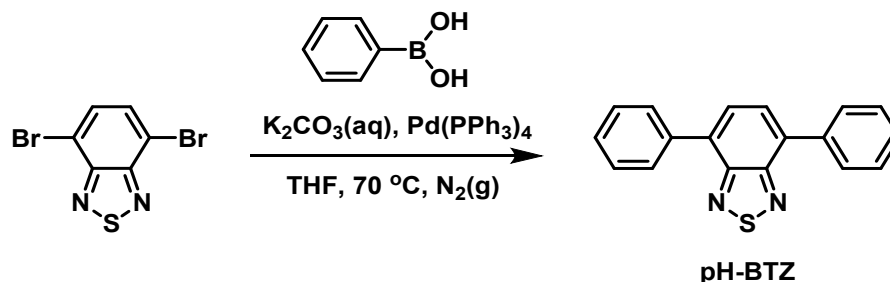

4,7-Dibromobenzo[*c*][1,2,5]thiadiazole (294 mg, 1.0 mmol), benzene boronic acid (305 mg, 2.5 mmol), potassium carbonate (276 mg, 2.0 mmol) and Pd(PPh<sub>3</sub>)<sub>4</sub> (58 mg, 0.05 mmol) were added to a 2-neck round bottom flask. The flask was evacuated and backfilled with nitrogen gas three times then degassed THF (40 mL) and deionised water (5 mL) were added. The reaction was then heated to 70 °C for 16 hours then allowed to cool to room temperature and poured onto deionised water and extracted with DCM (3 x 25 mL). The combined organic phases were dried over MgSO<sub>4</sub> and the solvent removed under reduced pressure. The crude product was recrystallised from methylated spirits to give yellow needles (173 mg, 60%). <sup>1</sup>H NMR (CDCl<sub>3</sub>, 300 MHz, 25.0 °C) δ<sub>H</sub> 7.97 (m, 4 H), 7.80 (s, 2 H), 7.59 (m, 4 H), 7.47 (m, 2 H). <sup>13</sup>C NMR (CDCl<sub>3</sub>, 75.5 MHz, 25.0 °C) δ<sub>C</sub> 154.1 (C), 137.5 (C), 133.4 (C), 129.3 (CH), 128.7 (CH), 128.4 (CH), 128.2 (CH). UV-Vis (CHCl<sub>3</sub>) λ<sub>max</sub> (nm) 380. IR  $\bar{\nu}$  (cm<sup>-1</sup>) 3027 (w, C-H str.).

### pH-BTZ-BCl<sub>2</sub>

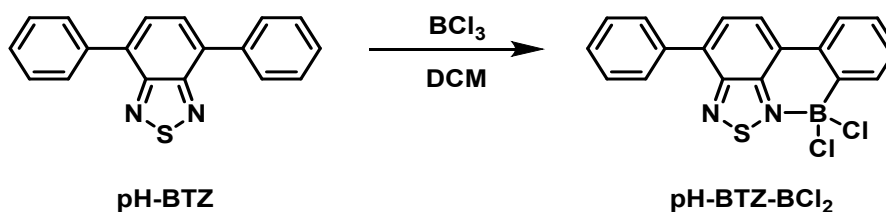

pH-BTZ (72 mg, 0.25 mmol) was dissolved in dry DCM (5 mL) then BCl<sub>3</sub> (1 M in DCM, 1.5 mmol, 1.5 mL) added and the solution stirred at room temperature overnight under a dynamic stream of nitrogen. Following this the solvent and excess BCl<sub>3</sub> were removed under reduced pressure to yield a dark red-purple powder (88 mg, 95%). <sup>1</sup>H NMR (CDCl<sub>3</sub>, 300 MHz, 25.0 °C) δ<sub>H</sub> 8.47 (d, 1 H, J = 7.6 Hz), 8.08 (dd, 1 H, J = 7.8, 1.0 Hz), 8.05 (d, 1 H, J = 7.8 Hz), 8.02 (d, 1 H, J = 7.5 Hz), 7.94 (m, 2 H), 7.60 (m, 2 H), 7.54 (m, 2 H), 7.48 (m, 1 H). <sup>11</sup>B NMR (CDCl<sub>3</sub>, 96 MHz, 25.0 °C) δ<sub>H</sub> 4.30 (1 B). UV-Vis (CHCl<sub>3</sub>) λ<sub>max</sub> (nm) 510. A <sup>13</sup>C NMR spectra of satisfactory quality could not be obtained due to the low solubility of pH-BTZ-BCl<sub>2</sub> in common solvents.

4-([1,1'-Biphenyl]-2-yl)-7-phenylbenzo[*c*][1,2,5]thiadiazole (pH-BTZ-oPh)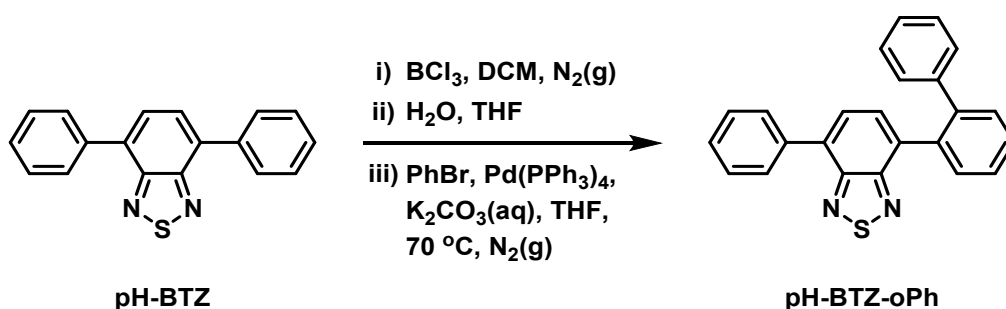

**pH-BTZ** (72 mg, 0.25 mmol) was dissolved in dry DCM (5 mL) and  $\text{BCl}_3$  (1 M in DCM, 1.5 mmol, 1.5 mL) added. The solution was stirred at room temperature overnight under a constant stream of nitrogen. The solvent and any excess  $\text{BCl}_3$  were removed under reduced pressure to yield a dark red powder. The residue was dissolved in THF (15 mL) and deionised water (5 mL) then the solution was stirred for 3 hours.  $\text{K}_2\text{CO}_3$  (346 mg, 2.5 mmol) and bromobenzene (79 mg, 0.5 mmol) were added to the reaction mixture which was then bubbled with nitrogen for 30 minutes.  $\text{Pd}(\text{PPh}_3)_4$  (14 mg, 0.013 mmol) was added and then the solution was heated to  $70\text{ }^\circ\text{C}$  for 16 hours. Following this time, the solution was cooled to room temperature then poured onto water (50 mL) and extracted with DCM (3 x 25 mL). The combined organic phases were dried over  $\text{MgSO}_4$  and the solvent removed under reduced pressure. The crude product was recrystallised from hot methylated spirits to yield small yellow crystals that were washed with *n*-hexane (50 mg, 55%).  $^1\text{H NMR}$  ( $\text{CDCl}_3$ , 300 MHz,  $25.0\text{ }^\circ\text{C}$ )  $\delta_{\text{H}}$  7.93 (m, 2 H), 7.66 (m, 1 H), 7.58 (d, 1 H,  $J = 7.2\text{ Hz}$ ), 7.52 (m, 5 H), 7.43 (m, 1 H), 7.36 (d, 1 H,  $J = 7.2\text{ Hz}$ ), 7.12 (m, 5 H).  $^{13}\text{C NMR}$  ( $\text{CDCl}_3$ , 75.5 MHz,  $25.0\text{ }^\circ\text{C}$ )  $\delta_{\text{C}}$  154.8 (C), 153.4 (C), 141.8 (C), 141.4 (C), 137.3 (C), 136.1 (C), 133.8 (C), 132.7 (C), 131.2 (CH), 130.6 (CH), 129.3 (CH), 129.2 (CH), 128.6 (CH), 128.3 (CH), 127.8 (CH), 127.6 (CH), 127.3 (CH), 126.6 (CH).  $\text{IR } \bar{\nu}$  ( $\text{cm}^{-1}$ ) 3050 (w, C-H str.). **UV-Vis** ( $\text{CHCl}_3$ )  $\lambda_{\text{max}}$  (nm) 377.

4,7-Di([1,1'-biphenyl]-2-yl)benzo[*c*][1,2,5]thiadiazole (pH-BTZ-oPh<sub>2</sub>)<sup>7</sup>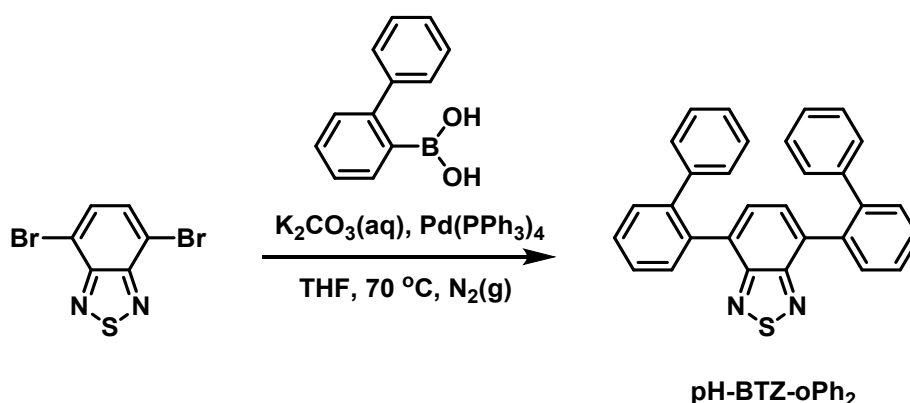

4,7-Dibromobenzo[*c*][1,2,5]thiadiazole (294 mg, 1.0 mmol), 2-biphenyl boronic acid (495 mg, 2.5 mmol), potassium carbonate (276 mg, 2.0 mmol) and Pd(PPh<sub>3</sub>)<sub>4</sub> (58 mg, 0.05 mmol) were added to a 2-neck round bottom flask. The flask was evacuated and backfilled with nitrogen gas three times then degassed THF (40 mL) and deionised water (5 mL) were added. The reaction was then heated to 70 °C for 16 hours then allowed to cool to room temperature and poured onto deionised water and extracted with DCM (3 x 25 mL). The combined organic phases were dried over MgSO<sub>4</sub> and the solvent removed under reduced pressure. The crude product was washed with hot methylated spirits to yield a yellow powder (280 mg, 64%). **<sup>1</sup>H NMR** (CDCl<sub>3</sub>, 300 MHz, 25.0 °C) δ<sub>H</sub> 7.60 (m, 2 *H*), 7.52 (m, 4 *H*), 7.48 (m, 2 *H*), 7.14 (s, 2 *H*), 7.09 (m, 10 *H*). **UV-Vis** (CHCl<sub>3</sub>) λ<sub>max</sub> (nm) 373. **IR** ν̄ (cm<sup>-1</sup>) 3060 (w, C-H str.). A <sup>13</sup>C NMR spectra of satisfactory quality could not be obtained due to the low solubility of **pH-BTZ-oPh<sub>2</sub>** in common solvents.

#### 4,7-Di(thiophen-2-yl)benzo[*c*][1,2,5]thiadiazole (Th-BTZ)<sup>7</sup>

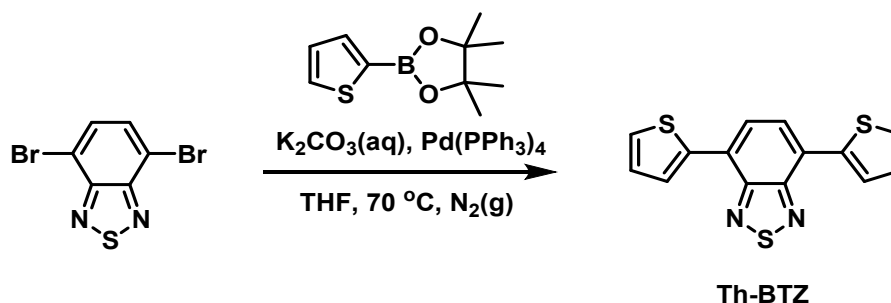

4,7-Dibromobenzo[*c*][1,2,5]thiadiazole (294 mg, 1.0 mmol), 2-thiophene boronic acid pinacol ester (525 mg, 2.5 mmol), potassium carbonate (276 mg, 2.0 mmol) and Pd(PPh<sub>3</sub>)<sub>4</sub> (58 mg, 0.05 mmol) were added to a 2-neck round bottom flask. The flask was evacuated and backfilled with nitrogen gas three times then degassed THF (40 mL) and deionised water (5 mL) were added. The reaction was then heated to 70 °C for 16 hours then allowed to cool to room temperature and poured onto deionised water and extracted with DCM (3 x 25 mL). The combined organic phases were dried over MgSO<sub>4</sub> and the solvent removed under reduced pressure. The crude product was recrystallised from hot methylated spirits to give red needles (200 mg, 67%). **<sup>1</sup>H NMR** (CDCl<sub>3</sub>, 300 MHz, 25.0 °C) δ<sub>H</sub> 8.13 (dd, *J* = 3.7, 1.1 Hz, 2 *H*), 7.89 (s, 2 *H*), 7.45 (dd, *J* = 5.1, 1.1 Hz, 2 *H*), 7.22 (dd, *J* = 5.1 Hz, 3.7 Hz, 2 *H*). **<sup>13</sup>C NMR** (CDCl<sub>3</sub>, 75.5 MHz, 25.0 °C) δ<sub>C</sub> 152.7 (C), 139.4 (C), 128.0 (CH), 127.5 (CH), 126.8 (CH), 126.1 (C), 125.8 (CH). **UV-Vis** (CHCl<sub>3</sub>) λ<sub>max</sub> (nm) 446. **IR** ν̄ (cm<sup>-1</sup>) 2990 (w, C-H str.).

**Th-BTZ-BCl<sub>2</sub>**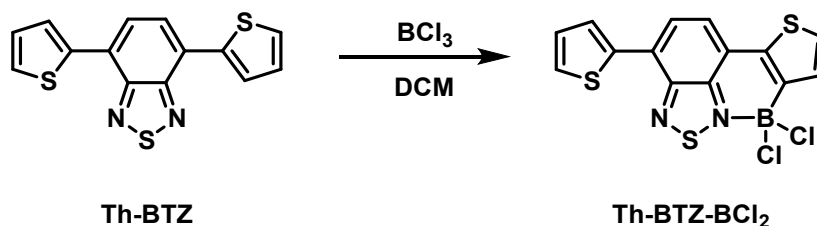

**Th-BTZ** (75 mg, 0.25 mmol) was dissolved in dry DCM (5 mL) then BCl<sub>3</sub> (1 M in DCM, 1.5 mmol, 1.5 mL) added and the solution stirred at room temperature overnight under a dynamic stream of nitrogen. Following this, the solvent and excess BCl<sub>3</sub> were removed under reduced pressure to yield a dark blue powder (85 mg, 90%). <sup>1</sup>H NMR (CDCl<sub>3</sub>, 300 MHz, 25.0 °C) δ<sub>H</sub> 8.11 (dd, 1 H, J = 4.0, 1.1 Hz), 7.98 (d, 1 H, J = 7.6 Hz), 7.87 (d, 1 H, J = 7.6 Hz), 7.55 (dd, 1 H, J = 5.1, 1.1 Hz), 7.51 (m, 2 H), 7.25 (m, 1 H). <sup>11</sup>B NMR (CDCl<sub>3</sub>, 96 MHz, 25.0 °C) δ<sub>B</sub> 3.79 (1 B). UV-Vis (CHCl<sub>3</sub>) λ<sub>max</sub> (nm) 604. A <sup>13</sup>C NMR spectra of satisfactory quality could not be obtained due to the low solubility of **Th-BTZ-BCl<sub>2</sub>** in common solvents.

**4-(3-phenylthiophen-2-yl)-7-(thiophen-2-yl)benzo[c][1,2,5]thiadiazole (Th-BTZ-oPh<sub>2</sub>)**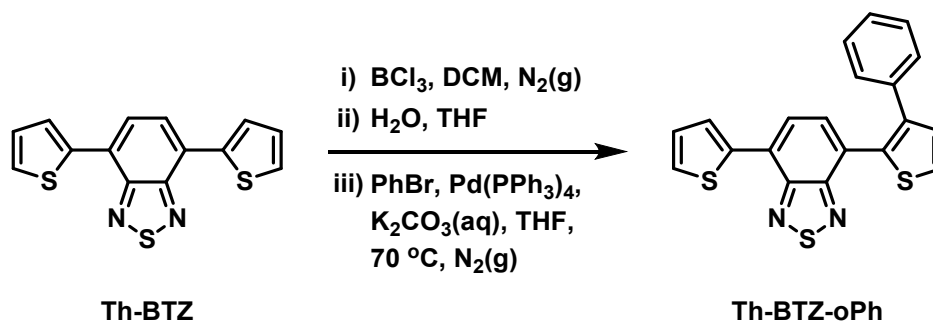

**Th-BTZ** (300 mg, 1.0 mmol) was dissolved in dry DCM (5 mL) and BCl<sub>3</sub> (1 M in DCM, 6 mmol, 6 mL) was added. The solution was stirred at room temperature overnight under a dynamic stream of nitrogen then the solvent and excess BCl<sub>3</sub> removed under reduced pressure to yield a dark blue powder. The residue was dissolved in THF (30 mL) and deionised water (10 mL) then the solution was stirred for 3 hours. K<sub>2</sub>CO<sub>3</sub> (1.3821 g, 2.5 mmol) and bromobenzene (314 mg, 2.0 mmol) were added to the reaction mixture which was then bubbled with nitrogen for 30 minutes. Pd(PPh<sub>3</sub>)<sub>4</sub> (57 mg, 0.05 mmol) was added and then the solution was heated to 70 °C for 16 hours. Following this time, the solution was cooled to room temperature then poured onto water (50 mL) and extracted with DCM (3 x 25 mL). The combined organic phases were dried over MgSO<sub>4</sub> and the solvent removed under reduced pressure. The crude product was then purified *via* silica gel column-chromatography using DCM:hexane 1:4 as the eluent to yield red crystals (217 mg, 57%). <sup>1</sup>H NMR (CDCl<sub>3</sub>, 300 MHz, 25.0 °C) δ<sub>H</sub> 8.13 (dd, 1 H, J = 3.9, 1.2 Hz), 7.74 (d, 1 H, J = 7.5 Hz), 7.57 (d, 1 H, J = 5.2 Hz), 7.47 (dd, 1 H, J = 5.2, 1.1 Hz), 7.45 (d, 1 H, J = 7.5 Hz), 7.30 (m, 2 H), 7.29 (d, 1 H, J = 5.2 Hz), 7.26 (m, 3 H), 7.22 (dd, 1 H, J = 5.2, 3.8 Hz). <sup>13</sup>C NMR (CDCl<sub>3</sub>, 75.5

MHz, 25.0 °C)  $\delta_c$  154.2 (C), 152.3 (C), 141.1 (C), 139.3 (C), 136.8 (C), 133.1, 130.6 (CH), 130.0 (CH), 128.8 (CH), 128.5 (CH), 128.0 (CH), 127.7 (CH), 127.0 (CH), 127.0 (CH), 126.5 (CH), 126.2 (C), 125.4 (C). **UV-Vis** (CHCl<sub>3</sub>)  $\lambda_{\max}$  (nm) 432. **IR**  $\bar{\nu}$  (cm<sup>-1</sup>) 3050 (w, C-H str.).

#### 4,7-Bis(3-phenylthiophen-2-yl)benzo[c][1,2,5]thiadiazole (Th-BTZ-oPh<sub>2</sub>)

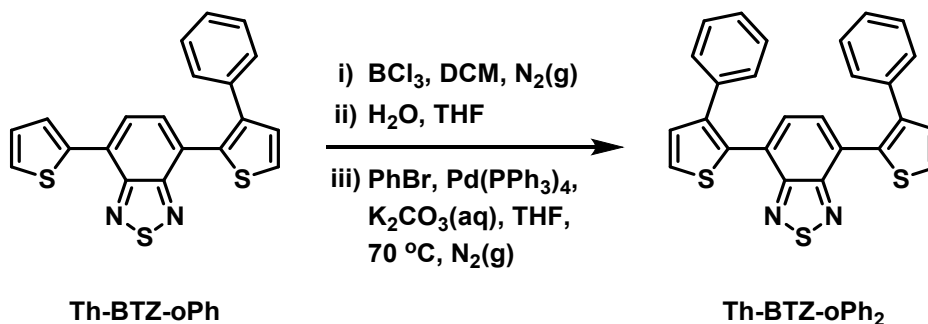

**Th-BTZ-oPh** (188 mg, 0.5 mmol) was dissolved in dry DCM (5 mL) and BCl<sub>3</sub> (1 M in DCM, 3 mmol, 3 mL) was added. The solution was stirred at room temperature overnight under a dynamic stream of nitrogen then the solvent and excess BCl<sub>3</sub> were removed under reduced pressure to yield a dark blue powder. The residue was dissolved in THF (30 mL) and deionised water (10 mL) then the solution was stirred for 3 hours. K<sub>2</sub>CO<sub>3</sub> (691 mg, 5.0 mmol) and bromobenzene (157 mg, 1.0 mmol) were added to the reaction mixture which was then bubbled with nitrogen for 30 minutes. Pd(PPh<sub>3</sub>)<sub>4</sub> (29 mg, 0.025 mmol) was added and then the solution was heated to 70 °C for 16 hours. Following this time, the solution was cooled to room temperature then poured onto water (50 mL) and extracted with DCM (3 x 25 mL). The combined organic phases were dried over MgSO<sub>4</sub> and the solvent removed under reduced pressure. The crude product was then purified *via* silica gel column-chromatography using DCM:hexane 1:4 as the eluent to yield orange-red crystals (45 mg, 20%). **<sup>1</sup>H NMR** (CDCl<sub>3</sub>, 300 MHz, 25.0 °C)  $\delta_H$  7.56 (d, 2 H, J = 5.1 Hz), 7.27 (d, 2 H, J = 5.1 Hz), 7.26 (s, 2 H), 7.23 (m, 10 H). **<sup>13</sup>C NMR** (CDCl<sub>3</sub>, 75.5 MHz, 25.0 °C)  $\delta_c$  153.9 (C), 141.2 (C), 136.7 (C), 132.9 (C), 130.2 (CH), 130.0 (CH), 128.8 (CH), 128.4 (CH), 127.0 (CH), 126.7 (C), 126.6 (CH). **UV-Vis** (CHCl<sub>3</sub>)  $\lambda_{\max}$  (nm) 423. **IR**  $\bar{\nu}$  (cm<sup>-1</sup>) 3050 (w, C-H str.).

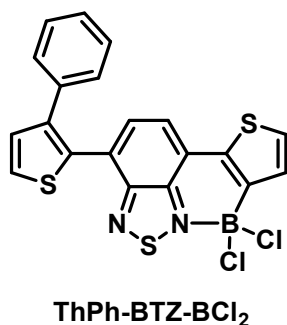

Although synthesised as part of a one-pot, three-step synthesis, a small amount of the intermediate **ThPh-BTZ-BCl<sub>2</sub>** was withdrawn for analysis by <sup>1</sup>H and <sup>11</sup>B NMR spectroscopy. **ThPh-BTZ-BCl<sub>2</sub>** was obtained as a dark-blue powder with <sup>1</sup>H NMR showing >99% conversion. **<sup>1</sup>H NMR** (CDCl<sub>3</sub>, 300 MHz, 25.0 °C)  $\delta_H$  7.71 (d, 1 H, J = 7.5 Hz), 7.62 (d, 1 H, J = 5.2 Hz), 7.58 (d, 1 H, J = 7.5 Hz), 7.49 (m, 2 H), 7.31 (d, 1 H, J = 5.2 Hz), 7.28 (m, 5 H). **<sup>11</sup>B NMR** (CDCl<sub>3</sub>, 96 MHz, 25.0 °C)  $\delta_B$  3.32 (1 B). A <sup>13</sup>C NMR spectra of satisfactory quality could not be obtained due to the low solubility of **ThPh-BTZ-BCl<sub>2</sub>** in common solvents.



### 3. Single Crystal X-Ray Structures

#### Crystal data for pH-BTZ-BCl<sub>2</sub> (CCDC Deposition Number 2208644)

Crystal grown by slow evaporation from chloroform solution. Crystal data for C<sub>18</sub>H<sub>11</sub>BCl<sub>2</sub>N<sub>2</sub>S (*M* = 369.06 g/mol): monoclinic, space group P2<sub>1</sub>/c (no. 14), *a* = 11.5839(4) Å, *b* = 7.0849(3) Å, *c* = 18.9487(8) Å, β = 91.452(3)°, *V* = 1554.64(11) Å<sup>3</sup>, *Z* = 4, *T* = 101(2) K, μ(CuKα) = 5.008 mm<sup>-1</sup>, *D*<sub>calc</sub> = 1.577 g/cm<sup>3</sup>, 37138 reflections measured (7.634° ≤ 2θ ≤ 140.174°), 2992 unique (*R*<sub>int</sub> 0.0661, *R*<sub>sigma</sub> = 0.0335) which were used in all calculations. The final *R*<sub>1</sub> was 0.0323 (*I* > 2σ(*I*)) and *wR*<sub>2</sub> was 0.0868 (all data).

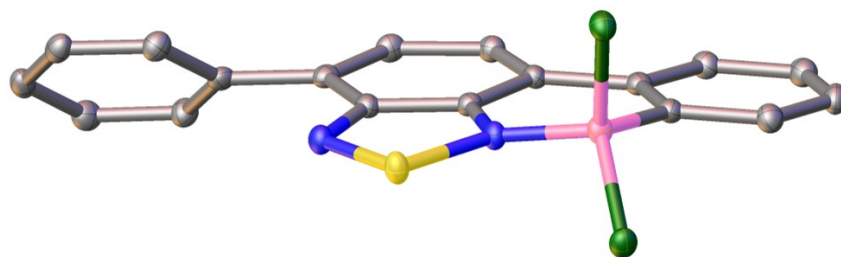

**Figure S1** X-ray crystal structure of pH-BTZ-BCl<sub>2</sub>. The atoms are shown as ellipsoids at 50% probability. H atoms omitted for clarity.

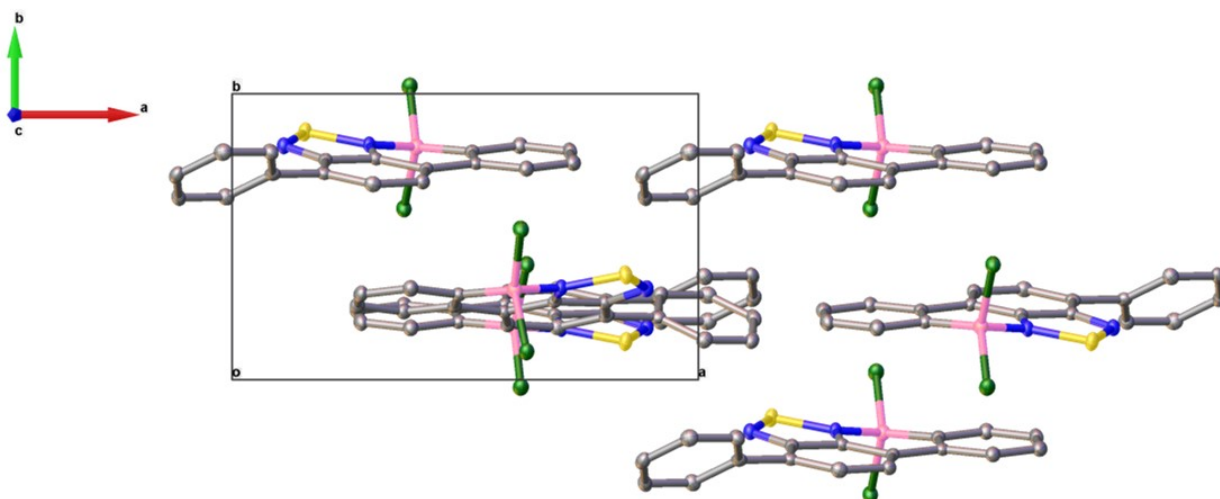

**Figure S2** X-ray crystal structure of pH-BTZ-BCl<sub>2</sub> showing the packing of molecules as viewed down the *c*-axis [001]. Hydrogen atoms omitted for clarity.

**Crystal data for pH-BTZ-oPh (CCDC Deposition Number 2208649)**

Crystal grown by slow evaporation from chloroform solution. Crystal data for  $C_{24}H_{16}N_2S$  ( $M = 364.45$  g/mol): monoclinic, space group  $P2_1/n$  (no. 14),  $a = 10.4393(6)$  Å,  $b = 10.3703(5)$  Å,  $c = 17.1418(12)$  Å,  $\beta = 107.199(3)^\circ$ ,  $V = 1772.77(18)$  Å<sup>3</sup>,  $Z = 4$ ,  $T = 100.0$  K,  $\mu(\text{CuK}\alpha) = 1.689$  mm<sup>-1</sup>,  $D_{\text{calc}} = 1.366$  g/cm<sup>3</sup>, 22077 reflections measured ( $10.806^\circ \leq 2\theta \leq 144.302^\circ$ ), 3468 unique ( $R_{\text{int}} = 0.0329$ ,  $R_{\text{sigma}} = 0.0235$ ) which were used in all calculations. The final  $R_1$  was 0.0351 ( $I > 2\sigma(I)$ ) and  $wR_2$  was 0.0883 (all data).

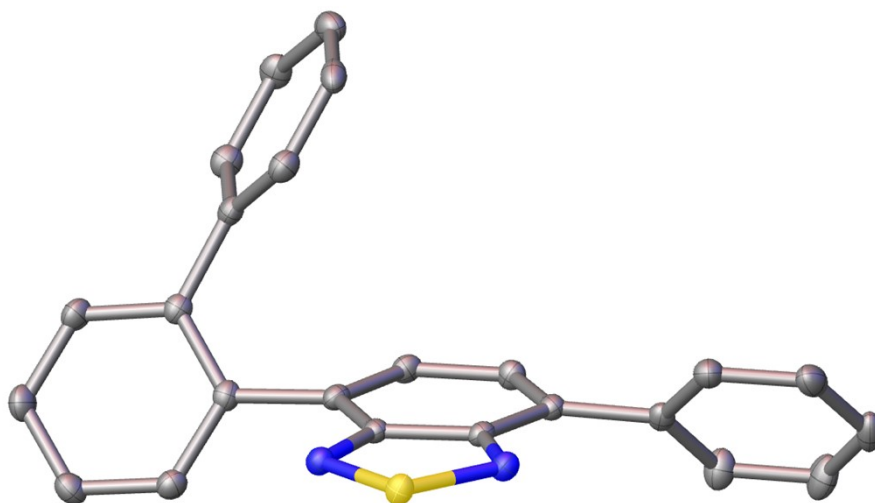

**Figure S3** X-ray crystal structure of **pH-BTZ-oPh**. The atoms are shown as ellipsoids at 50% probability. H atoms omitted for clarity.

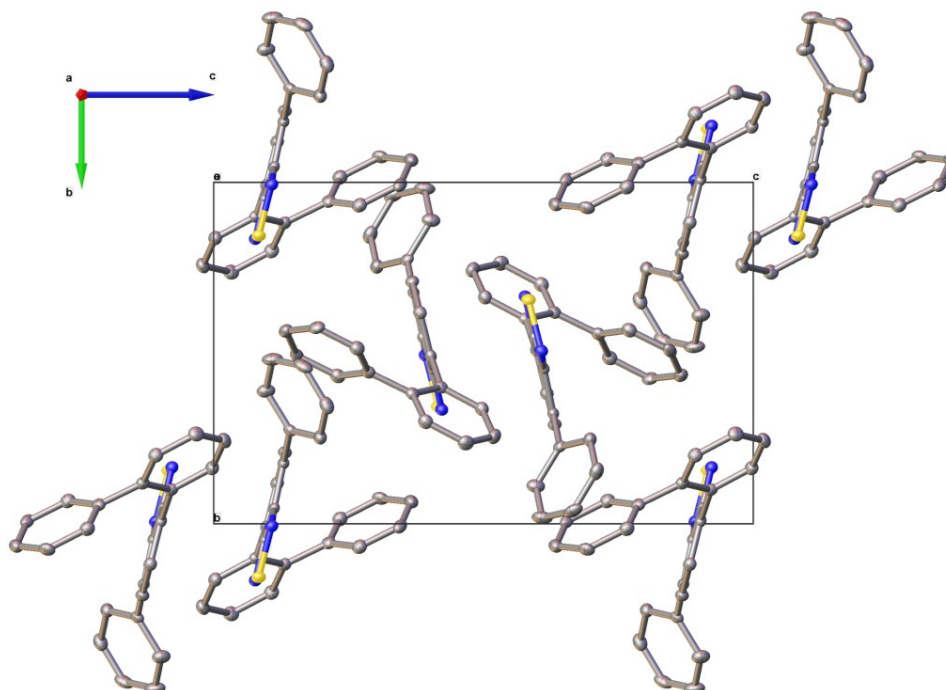

**Figure S4** X-ray crystal structure of **pH-BTZ-oPh** showing the packing of molecules as viewed down the a-axis [100]. Hydrogen atoms omitted for clarity.

**Crystal data for Th-BTZ-oPh (CCDC Deposition Number 2208650)**

Crystal grown by slow evaporation from acetone solution. Crystal data for  $C_{20}H_{12}N_2S_3$  ( $M = 376.50$  g/mol): triclinic, space group P-1 (no. 2),  $a = 6.87730(10)$  Å,  $b = 7.41610(10)$  Å,  $c = 16.8392(3)$  Å,  $\alpha = 89.3640(7)^\circ$ ,  $\beta = 85.3723(7)^\circ$ ,  $\gamma = 73.5196(7)^\circ$ ,  $V = 820.81(2)$  Å<sup>3</sup>,  $Z = 2$ ,  $T = 100(2)$  K,  $\mu(\text{CuK}\alpha) = 4.157$  mm<sup>-1</sup>,  $D_{\text{calc}} = 1.523$  g/cm<sup>3</sup>, 18869 reflections measured ( $10.542^\circ \leq 2\theta \leq 148.97^\circ$ ), 3306 unique ( $R_{\text{int}} = 0.0365$ ,  $R_{\text{sigma}} = 0.0257$ ) which were used in all calculations. The final  $R_1$  was 0.0275 ( $I > 2\sigma(I)$ ) and  $wR_2$  was 0.0704 (all data).

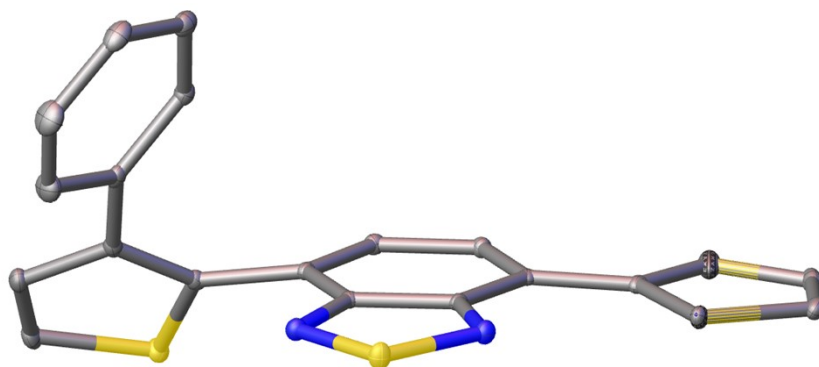

**Figure S5** X-ray crystal structure of **Th-BTZ-oPh**. The atoms are shown as ellipsoids at 50% probability. H atoms omitted for clarity.

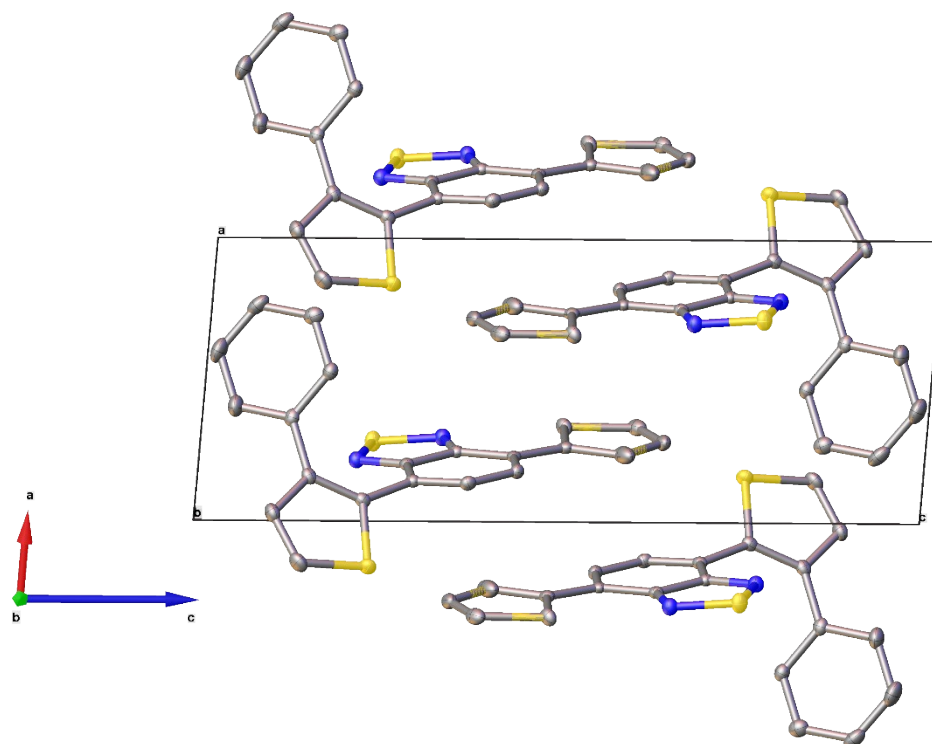

**Figure S6** X-ray crystal structure of **Th-BTZ-oPh** showing the packing of molecules as viewed down the b-axis [010]. Hydrogen atoms omitted for clarity.

**Crystal data for Th-BTZ-oPh<sub>2</sub> (CCDC Deposition Number 2208651)**

Grown by slow evaporation from acetone solution. Crystal data for  $C_{26}H_{16}N_2S_3$  ( $M = 452.59$  g/mol): monoclinic, space group  $P2_1$  (no. 4),  $a = 9.9159(3)$  Å,  $b = 9.8182(3)$  Å,  $c = 10.8445(3)$  Å,  $\beta = 101.7930(10)^\circ$ ,  $V = 1033.50(5)$  Å<sup>3</sup>,  $Z = 2$ ,  $T = 100.0$  K,  $\mu(\text{CuK}\alpha) = 3.407$  mm<sup>-1</sup>,  $D_{\text{calc}} = 1.454$  g/cm<sup>3</sup>, 27584 reflections measured ( $11.022^\circ \leq 2\theta \leq 136.47^\circ$ ), 3619 unique ( $R_{\text{int}} = 0.0326$ ,  $R_{\text{sigma}} = 0.0253$ ) which were used in all calculations. The final  $R_1$  was 0.0224 ( $I > 2\sigma(I)$ ) and  $wR_2$  was 0.0586 (all data).

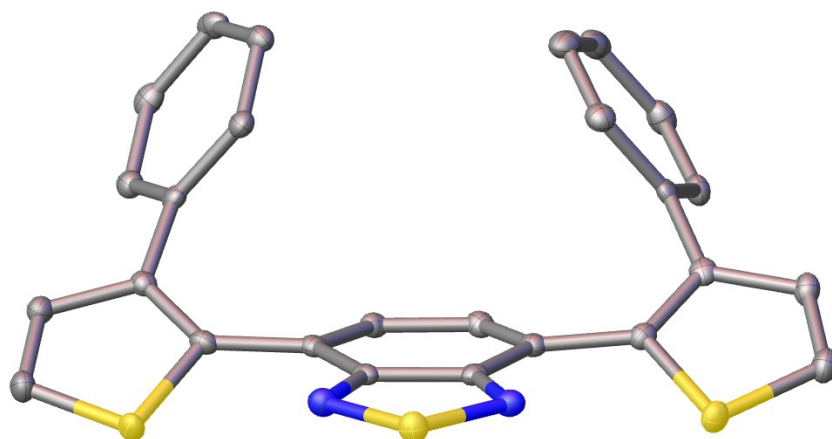

**Figure S7** X-ray crystal structure of **Th-BTZ-oPh<sub>2</sub>**. The atoms are shown as ellipsoids at 50% probability. H atoms omitted for clarity.

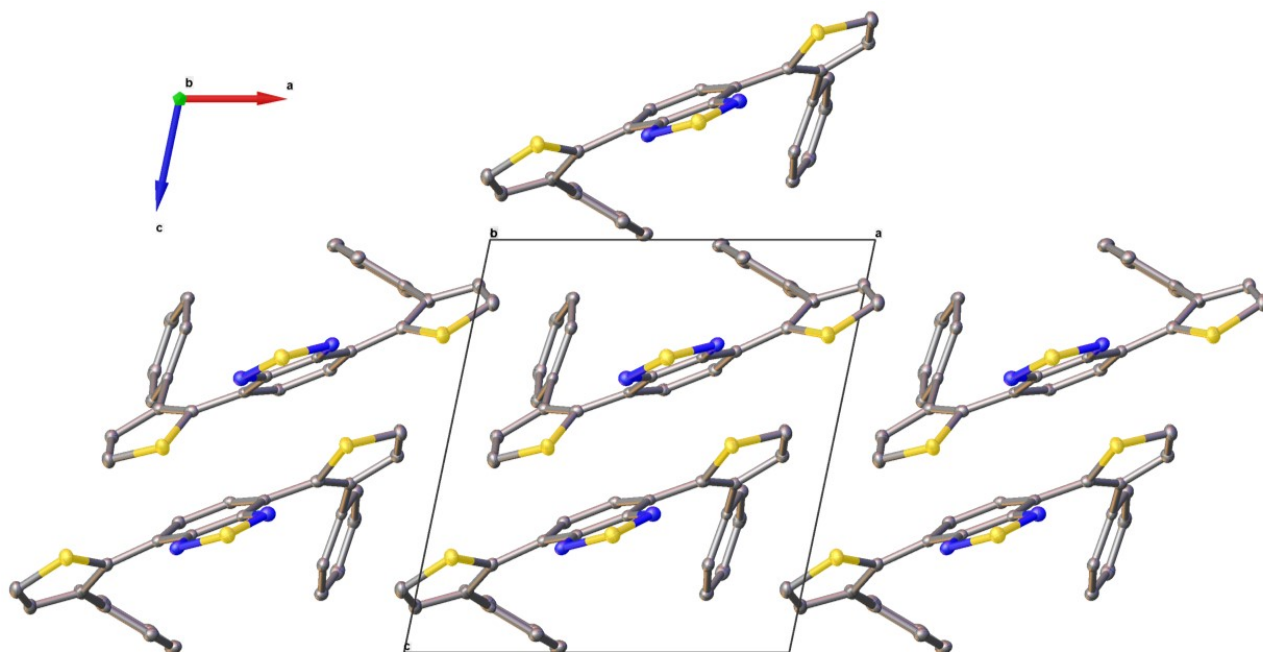

**Figure S8** X-ray crystal structure of **Th-BTZ-oPh<sub>2</sub>** showing the packing of molecules as viewed down the b-axis [010]. Hydrogen atoms omitted for clarity.

## 4. Photophysical Properties of the Fluorophores

### 4.1 UV-Vis Absorption and Emission Spectra

UV-Vis absorption spectra for the synthesised fluorophores were obtained using a Perkin-Elmer Lambda 35 in chloroform solution in 1 cm pathlength quartz cuvettes. For comparison between different spectra, each set of data was normalised to the maximum absorbance observed in the region of 350 – 800 nm.

Emission spectra in the visible region were recorded using a Perkin Elmer LS 55 fluorescence spectrometer in chloroform solution using quartz cuvettes. The excitation wavelength used was the wavelength of maximum absorption for each individual fluorophore. Data was collected in the region of 400 – 800 nm. Reflection of the excitation wavelengths were removed by subtracting blank spectra recorded at the same excitation wavelength.

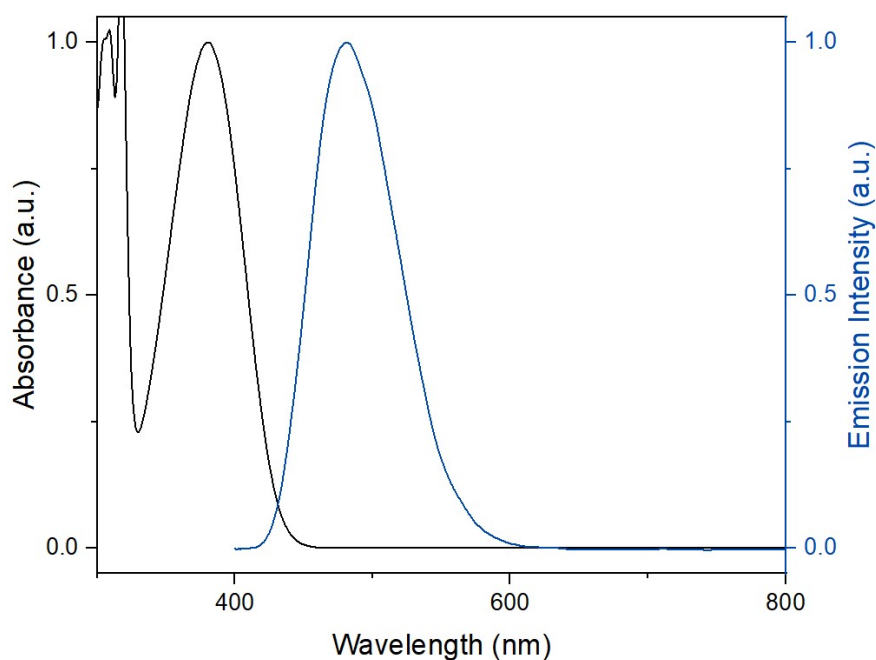

**Figure S9** Normalised absorption (black) and emission spectra (blue,  $\lambda_{\text{ex}} = 380$  nm) of **pH-BTZ** in  $\text{CHCl}_3$ .

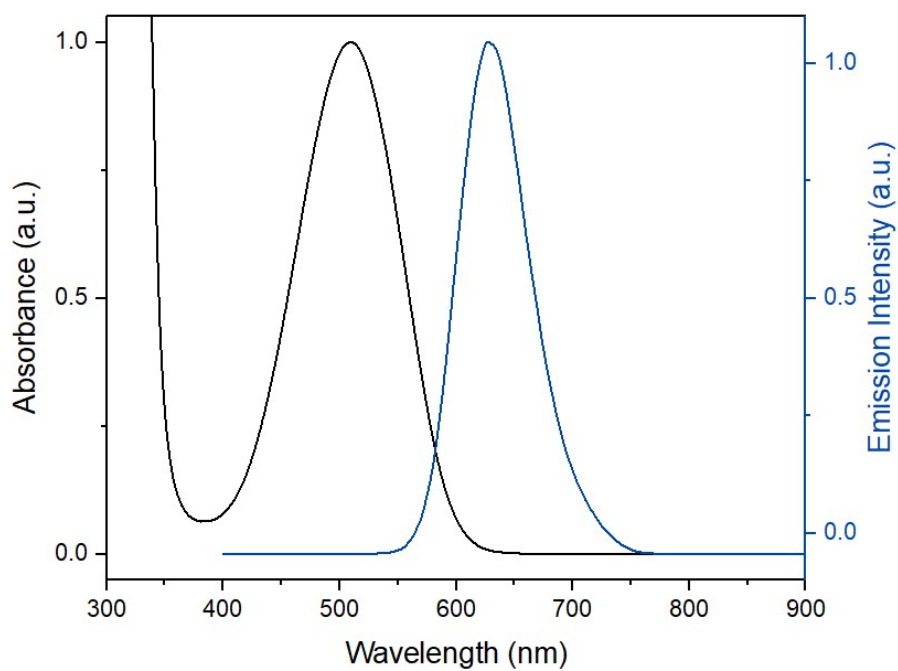

**Figure S10** Normalised absorption (black) and emission spectra (blue,  $\lambda_{\text{ex}} = 510$  nm) of **pH-BTZ-BCl<sub>2</sub>** in CHCl<sub>3</sub>.

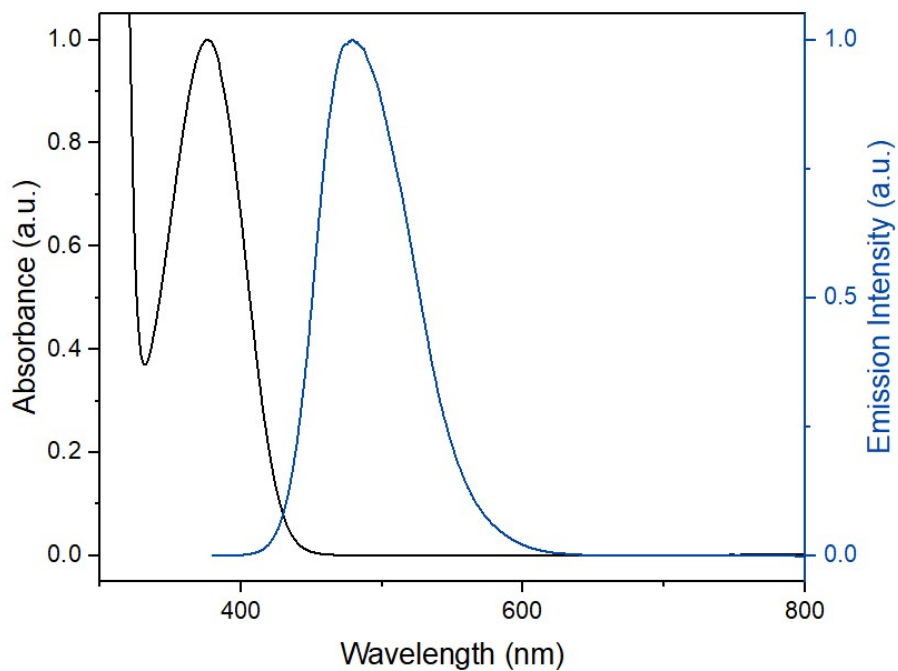

**Figure S11** Normalised absorption (black) and emission spectra (blue,  $\lambda_{\text{ex}} = 377$  nm) of **pH-BTZ-oPh** in CHCl<sub>3</sub>.

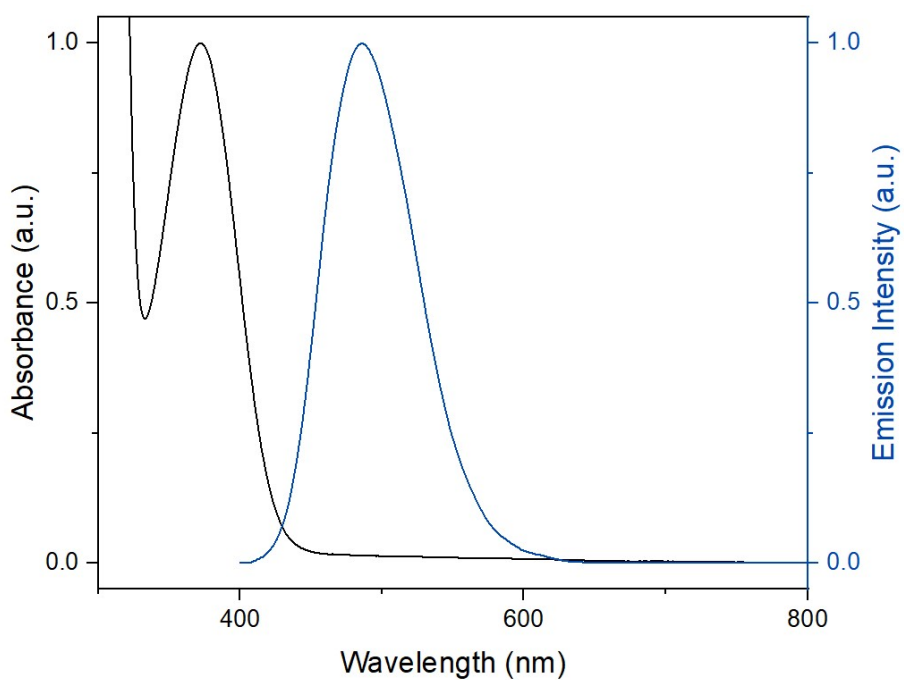

**Figure S12** Normalised absorption (black) and emission spectra (blue,  $\lambda_{\text{ex}} = 373$  nm) of **pH-BTZ-oPh<sub>2</sub>** in CHCl<sub>3</sub>.

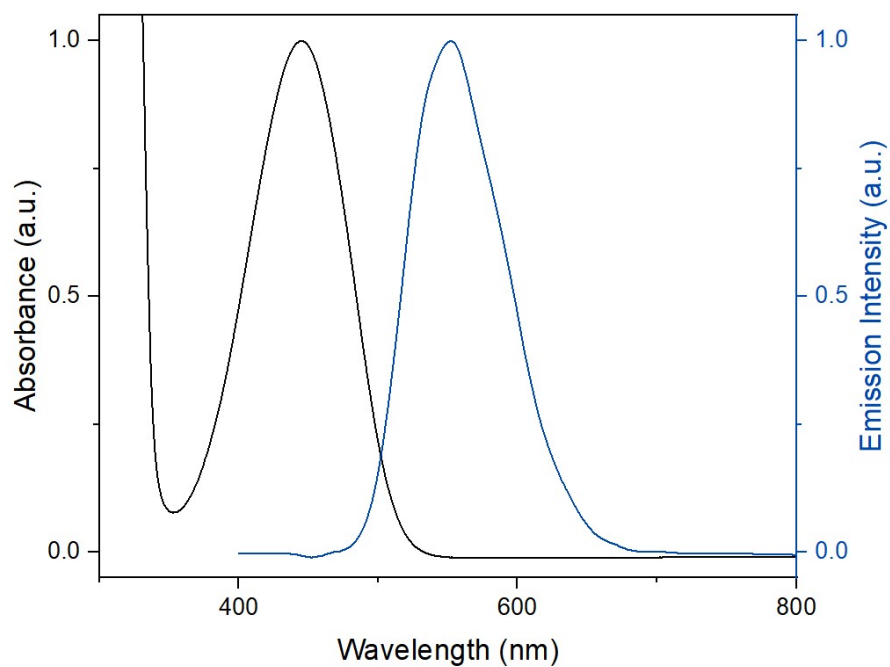

**Figure S13** Normalised absorption (black) and emission spectra (blue,  $\lambda_{\text{ex}} = 446$  nm) of **Th-BTZ** in CHCl<sub>3</sub>.

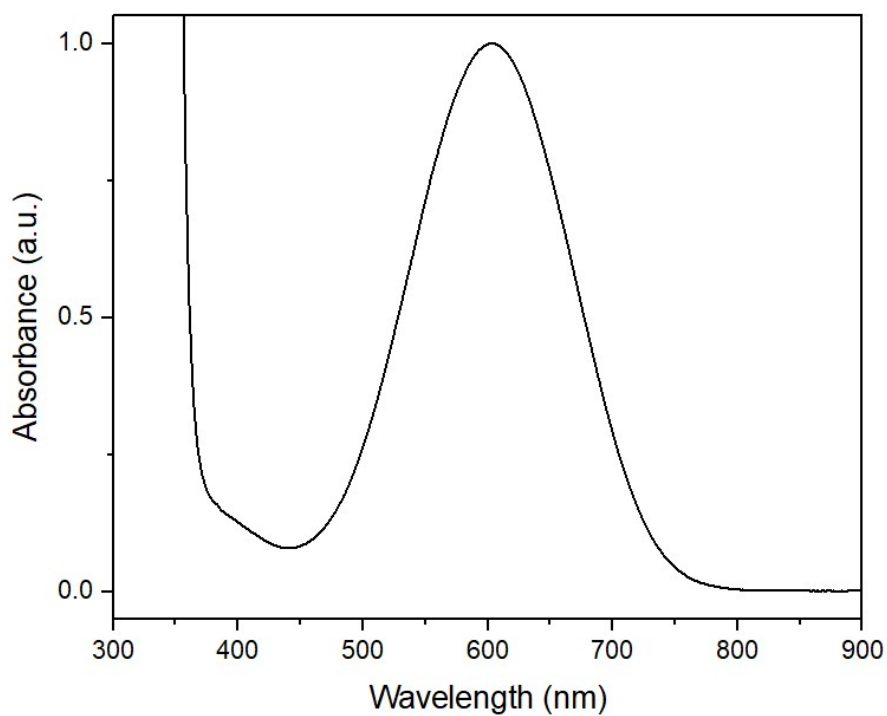

**Figure S14** Normalised absorption of Th-BTZ-BCl<sub>2</sub> in CHCl<sub>3</sub>. No visible emission was detected.

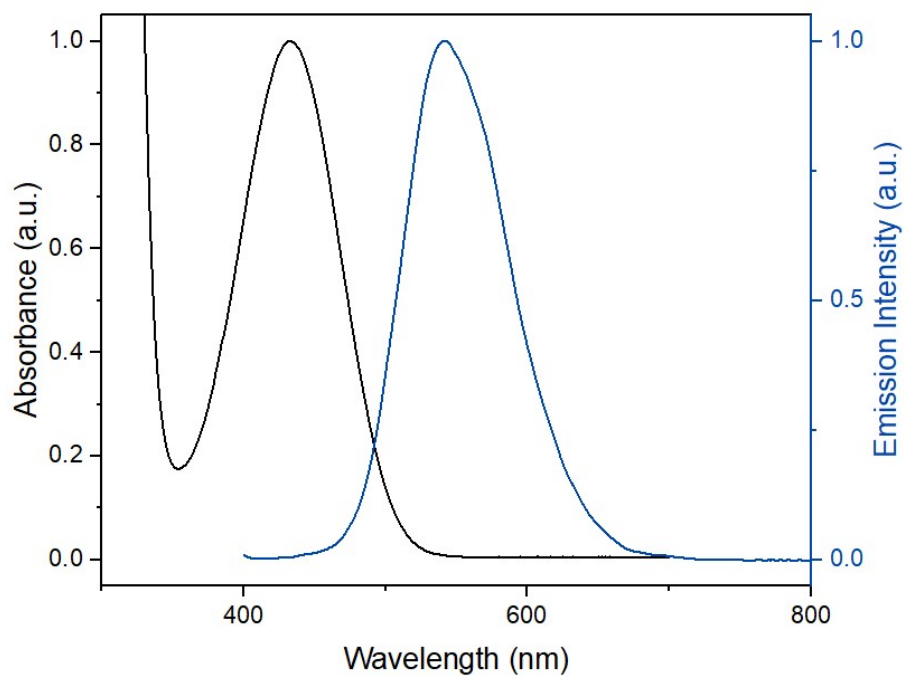

**Figure S15** Normalised absorption (black) and emission spectra (blue,  $\lambda_{\text{ex}} = 432$  nm) of Th-BTZ-oPh in CHCl<sub>3</sub>.



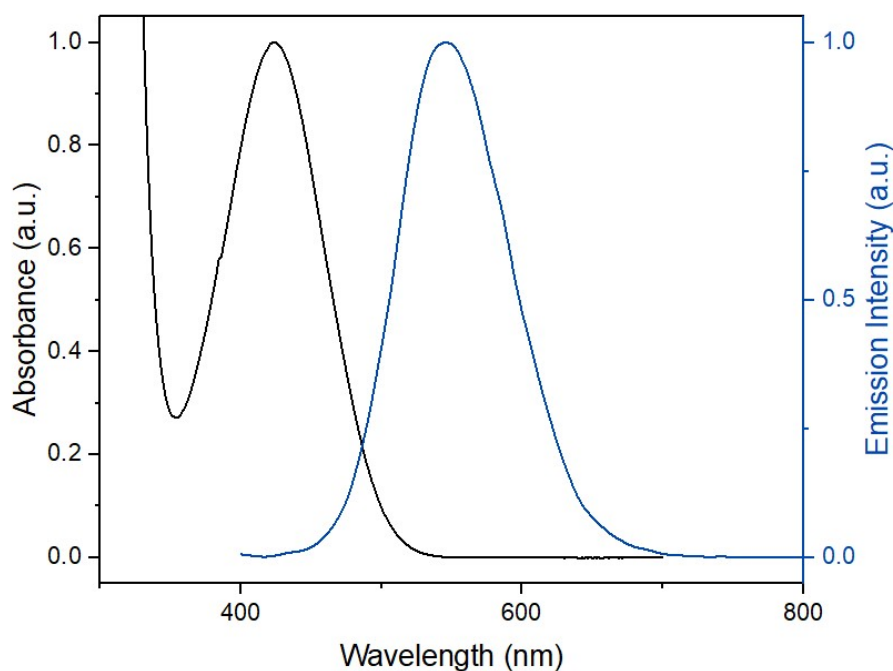

**Figure S16** Normalised absorption (black) and emission spectra (blue,  $\lambda_{\text{ex}} = 423 \text{ nm}$ ) of **Th-BTZ-oPh<sub>2</sub>** in  $\text{CHCl}_3$ .

#### 4.2 Molar Attenuation Coefficient Measurements

Molar attenuation coefficients ( $\epsilon_M$ ) of each fluorophore were measured by preparing stock solutions of each fluorophore in chloroform with concentrations in the range of 0 - 20  $\mu\text{M}$ . The absorbance of each of these solutions was then measured. Plotting absorbance against concentration gave a Beer-Lambert plot, with the attenuation coefficient equal to the gradient. The error quoted in the attenuation coefficient was taken as the error in the line fitting.

#### 4.3 Absolute Photoluminescence Quantum Yield and Fluorescence Lifetime Measurements

PLQYs measurements were obtained using a FLS920 spectrofluorometer, equipped with an extended red-sensitive photon multiplier detector and an integrating sphere with a 102 mm inner diameter. PLQY is defined as the ratio of the number of emitted photons ( $L_{\text{Sample}}$ ) to the number of absorbed photons, where the intensity of unabsorbed excitation light by a reference or by a sample is represented by  $E_{\text{Reference}}$  and  $E_{\text{Sample}}$  respectively, as shown by equation 1:

$$PLQY = \frac{\#photons\ emitted}{\#photons\ absorbed} = \frac{L_{\text{Sample}}}{E_{\text{Reference}} - E_{\text{Sample}}} \quad (1)$$

The samples consisting of 20  $\mu\text{M}$  fluorophores diluted in  $\text{CHCl}_3$ , were contained in a square quartz cuvette. Pure  $\text{CHCl}_3$  was used as reference. Each sample was excited at the wavelength corresponding to absorption maxima, shown in Table S1, using a 450 W Xenon lamp.

Lifetimes measurements were performed using the FLS920 spectrofluorometer, equipped with time-correlated single photon counting (TCSPC) electronics, and a 405 nm pulsed light emitting diode (ELED) as light source. The optical pulse is approximately 1 ns long (Figure S17). The collection was recorded at the highest intensity emission. The decay was fit with a single exponential, following the equation:

$$I = I_0 \cdot e^{-\frac{t}{\tau}} \quad (2)$$

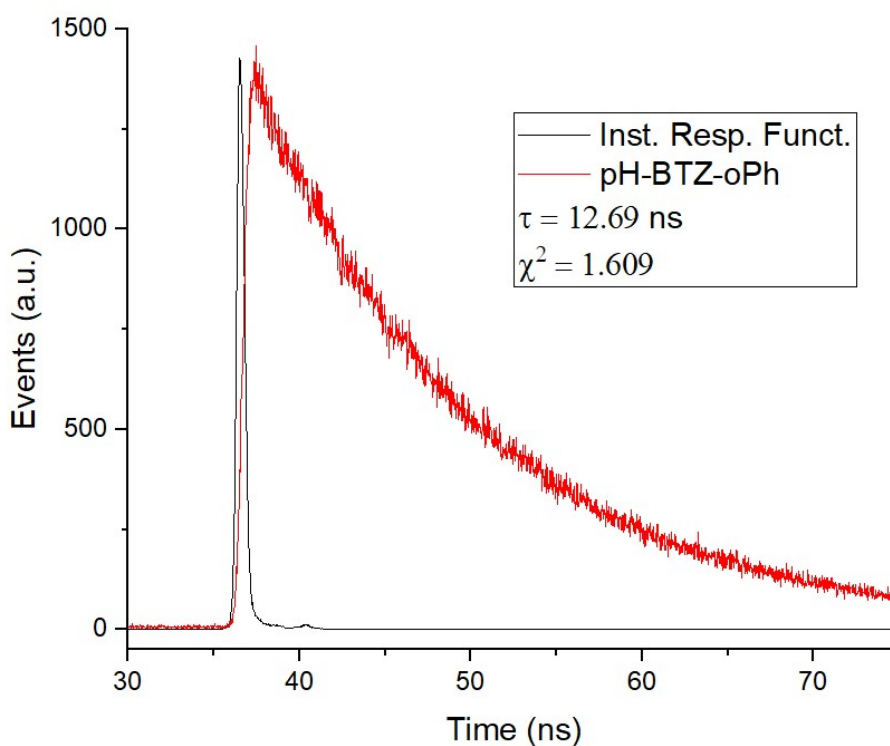

**Figure S17** Photoluminescence spectra of pH-BTZ-oPh.

#### 4.4 Estimation of Radiative and Non-radiative Relaxation Rate Constants

The rate constants for radiative relaxation ( $k_r$ ) and non-radiative relaxation ( $k_{nr}$ ) were estimated from PLQY and  $\tau_f$  using the relationships expressed in equations 3 and 4.<sup>8</sup>

$$k_r = \frac{PLQY}{\tau_f} \quad (3)$$

$$k_{nr} = \frac{1 - PLQY}{\tau_f} \quad (4)$$

**Table S1** Summary of the photophysical data for the **pH-BTZ** and **Th-BTZ** series of fluorophores. <sup>a</sup>In chloroform solution. <sup>b</sup>Excitation wavelength was the wavelength of maximum absorbance for each fluorophore. <sup>c</sup>Molar attenuation coefficient ( $\epsilon_M$ ) was measured as the gradient of a Beer-Lambert plot. <sup>d</sup>Absolute PLQY. <sup>e</sup>Fluorescence lifetime was measured by time-resolved photoluminescence spectroscopy (Figure S17). <sup>f</sup> $\chi^2$  values for each photoluminescence spectra. <sup>g</sup>Estimated using equations 3 and 4.

| Compound                      | $\lambda_{abs}/$<br>nm <sup>a</sup> | $\lambda_{em}/$<br>nm <sup>a,b</sup> | Stokes'<br>Shift/nm | $\epsilon_M / \times 10^3$<br>M <sup>-1</sup> cm <sup>-1</sup> c | PLQY <sup>a,d</sup> | $\tau_f/ns^{a,e}$ | $\chi^2$ | $k_r/\times 10^7$<br>s <sup>-1</sup> g | $k_{nr}/\times 10^7$<br>s <sup>-1</sup> g |
|-------------------------------|-------------------------------------|--------------------------------------|---------------------|------------------------------------------------------------------|---------------------|-------------------|----------|----------------------------------------|-------------------------------------------|
| <b>pH-BTZ</b>                 | 380                                 | 482                                  | 102                 | 7.5 ± 0.1                                                        | 0.864               | 10.01             | 1.331    | 8.63                                   | 1.36                                      |
| <b>pH-BTZ-oPh</b>             | 376                                 | 480                                  | 104                 | 6.9 ± 0.1                                                        | 1.00                | 12.69             | 1.609    | 7.88                                   | 0.00                                      |
| <b>pH-BTZ-oPh<sub>2</sub></b> | 373                                 | 486                                  | 113                 | 6.5 ± 0.2                                                        | 1.00                | 15.33             | 1.768    | 6.52                                   | 0.00                                      |
| <b>Th-BTZ</b>                 | 446                                 | 552                                  | 106                 | 12.1 ± 0.4                                                       | 0.881               | 13.13             | 1.927    | 6.71                                   | 0.91                                      |
| <b>Th-BTZ-oPh</b>             | 432                                 | 543                                  | 111                 | 9.3 ± 0.4                                                        | 0.864               | 12.84             | 1.992    | 6.73                                   | 1.06                                      |
| <b>Th-BTZ-oPh<sub>2</sub></b> | 423                                 | 547                                  | 124                 | 6.8 ± 0.4                                                        | 0.795               | 13.01             | 2.101    | 6.11                                   | 1.58                                      |

## 5. Computational Studies

### 5.1 General Information

All calculations were carried out utilising the Gaussian16 software,<sup>9</sup> and visualised using GaussView6.<sup>10</sup> Geometry optimisations were conducted utilising the B3LYP<sup>11-15</sup>/cc-pVTZ<sup>16</sup> model chemistry incorporating the SMD solvent model to model a dichloromethane solvent environment; structural minima were verified through the presence of only positive curvature upon vibrational frequency analysis.<sup>17</sup> TD-DFT calculations of the absorption spectra, along with NTO analysis, were conducted utilising the CAM-B3LYP<sup>18</sup>//cc-pVTZ model chemistry, again incorporating the SMD solvent model. CAM-B3LYP was selected at the functional of choice due to both its agreement with experimentally derived spectra within this work, and its strong performance in similar systems.<sup>19-23</sup> States showing significant contribution to the absorption peak, selected by an oscillator strength above 0.4, were selected for further analysis. Natural transition orbitals (NTOs) were calculated for each of these states, with the relative particle-hole orbitals relating to these transitions are shown in Tables S5-S10.

**Table S2** Comparison of the theoretical and experimental absorption maxima for the synthesised **BTZs**.

| <b>Compound</b>               | <b>Experimental <math>\lambda_{\text{abs}}/\text{nm}</math></b> | <b>Theoretical <math>\lambda_{\text{abs}}/\text{nm}</math></b> |
|-------------------------------|-----------------------------------------------------------------|----------------------------------------------------------------|
| <b>pH-BTZ</b>                 | 380                                                             | 369                                                            |
| <b>pH-BTZ-oPh</b>             | 376                                                             | 362                                                            |
| <b>pH-BTZ-oPh<sub>2</sub></b> | 373                                                             | 344                                                            |
| <b>Th-BTZ</b>                 | 446                                                             | 451                                                            |
| <b>Th-BTZ-oPh</b>             | 432                                                             | 413                                                            |
| <b>Th-BTZ-oPh<sub>2</sub></b> | 423                                                             | 397                                                            |

**Table S3** Comparison between the optimised computational geometry and literature crystal structures for **pH-BTZ** and **Th-BTZ**. Experimental data from reported X-ray crystal structures.<sup>24,25</sup> Theoretical data from previous computational studies conducted on **BTZ** photocatalysts.<sup>7</sup>

| Geometric Feature          | pH-BTZ      |              | Th-BTZ      |              |
|----------------------------|-------------|--------------|-------------|--------------|
|                            | Theoretical | Experimental | Theoretical | Experimental |
| <b>Bond Lengths/Å</b>      |             |              |             |              |
| S-N (1)                    | 1.62554     | 1.6273       | 1.6249      | 1.6096       |
| N-C (2)                    | 1.33713     | 1.3594       | 1.33506     | 1.3462       |
| C-C (3)                    | 1.45205     | 1.4514       | 1.45479     | 1.4442       |
| Acceptor-Donor C-C (4)     | 1.47843     | 1.4994       | 1.45532     | 1.4330       |
| <b>Angles/°</b>            |             |              |             |              |
| N-S-N (5)                  | 100.2613    | 101.45       | 99.87949    | 101.509      |
| S-N-C (6)                  | 106.9086    | 106.32       | 107.3116    | 106.3613     |
| Acceptor-Donor C-C-C (7)   | 123.0716    | 123.03       | 123.0282    | 123.04       |
| <b>Dihedral Angles/°</b>   |             |              |             |              |
| Acceptor-Donor C-C-C-C (8) | -141.352    | -142.53      | -           | -            |
| Acceptor-Donor C-C-C-S (9) | -           | -            | -179.97     | -175.711     |

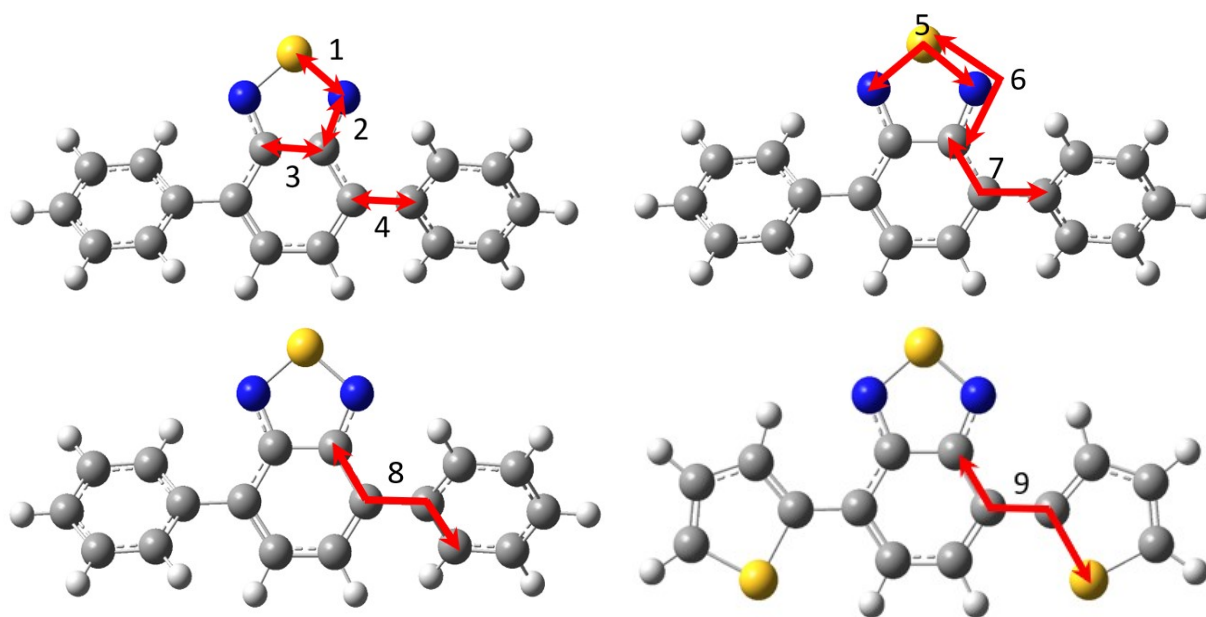

**Figure S18** Naming scheme for geometric features compared in Table S3. Colour legend: carbon (grey), hydrogen (white), nitrogen (blue) and sulfur (yellow).

**Table S4** Comparison between the optimised computational geometry and crystal structures for **pH-BTZ-oPh**, **Th-BTZ-oPh** and **Th-BTZ-oPh<sub>2</sub>**. Experimental data from the X-ray crystal structures is shown in section 3.

| Geometric Feature        | pH-BTZ-oPh  |              | Th-BTZ-oPh  |              | Th-BTZ-oPh <sub>2</sub> |              |
|--------------------------|-------------|--------------|-------------|--------------|-------------------------|--------------|
|                          | Theoretical | Experimental | Theoretical | Experimental | Theoretical             | Experimental |
| <b>Bond Lengths/Å</b>    |             |              |             |              |                         |              |
| S-N                      | 1.6253      | 1.6173       | 1.6248      | 1.6134       | 1.6255                  | 1.616        |
| N-C                      | 1.3378      | 1.3518       | 1.3361      | 1.3478       | 1.3362                  | 1.345        |
| C-C                      | 1.4466      | 1.431        | 1.4472      | 1.4277       | 1.4456                  | 1.434        |
| Acceptor-Donor C-C       | 1.4796      | 1.4911       | 1.458       | 1.4718       | 1.4676                  | 1.468        |
| Donor-oPh C-C            | 1.4866      | 1.491        | 1.467       | 1.4767       | 1.4676                  | 1.485        |
| <b>Angles/°</b>          |             |              |             |              |                         |              |
| N-S-N                    | 100.41      | 101.59       | 100.25      | 101.28       | 100.36                  | 100.83       |
| S-N-C                    | 106.59      | 106.17       | 106.72      | 106.22       | 106.66                  | 106.79       |
| Acceptor-Donor C-C-C     | 122.79      | 122.29       | 122.38      | 121.13       | 122.6                   | 122.82       |
| Donor-oPh C-C-C          | 121.76      | 122.55       | 122.73      | 125.60       | 122.6                   | 127.8        |
| <b>Dihedral Angles/°</b> |             |              |             |              |                         |              |
| Acceptor-Donor C-C-C-C/S | -137.87     | -128.38      | -156.78     | -125.82      | -52.8                   | -33.6        |
| Donor-oPh C-C-C-C        | 122.48      | 126.33       | -53.29      | -17.63       | -52.82                  | -43.4        |

## 5.2 Theoretical Absorption Spectra

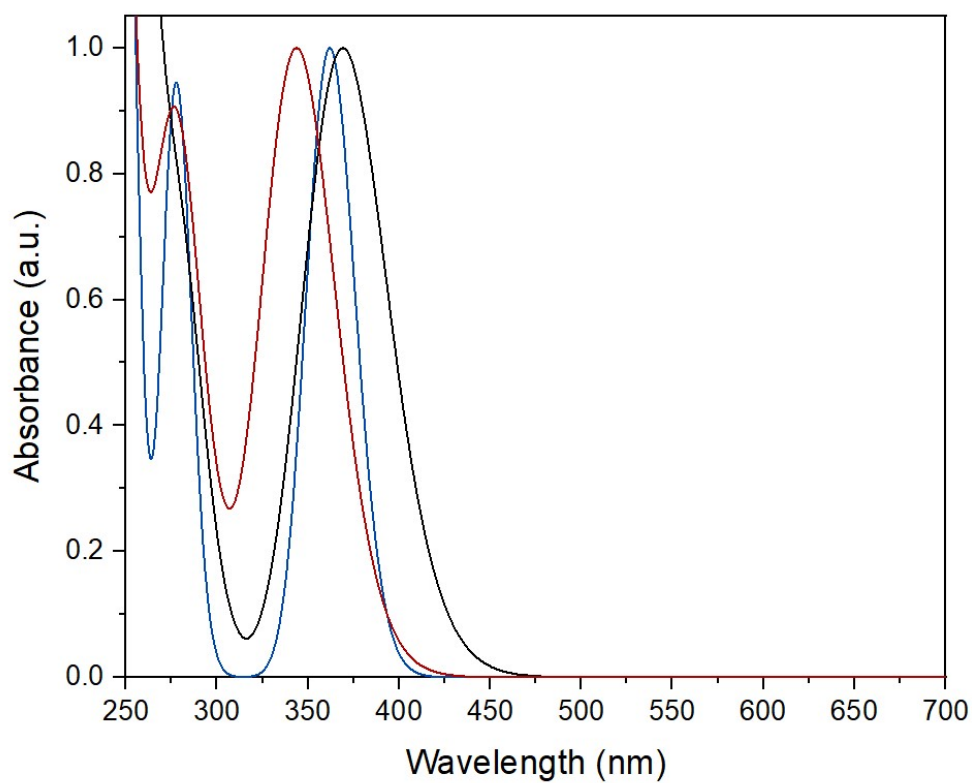

**Figure S19** Normalised theoretical absorption spectra of **pH-BTZ** (black), **pH-BTZ-oPh** (blue) and **pH-BTZ-oPh** (red).

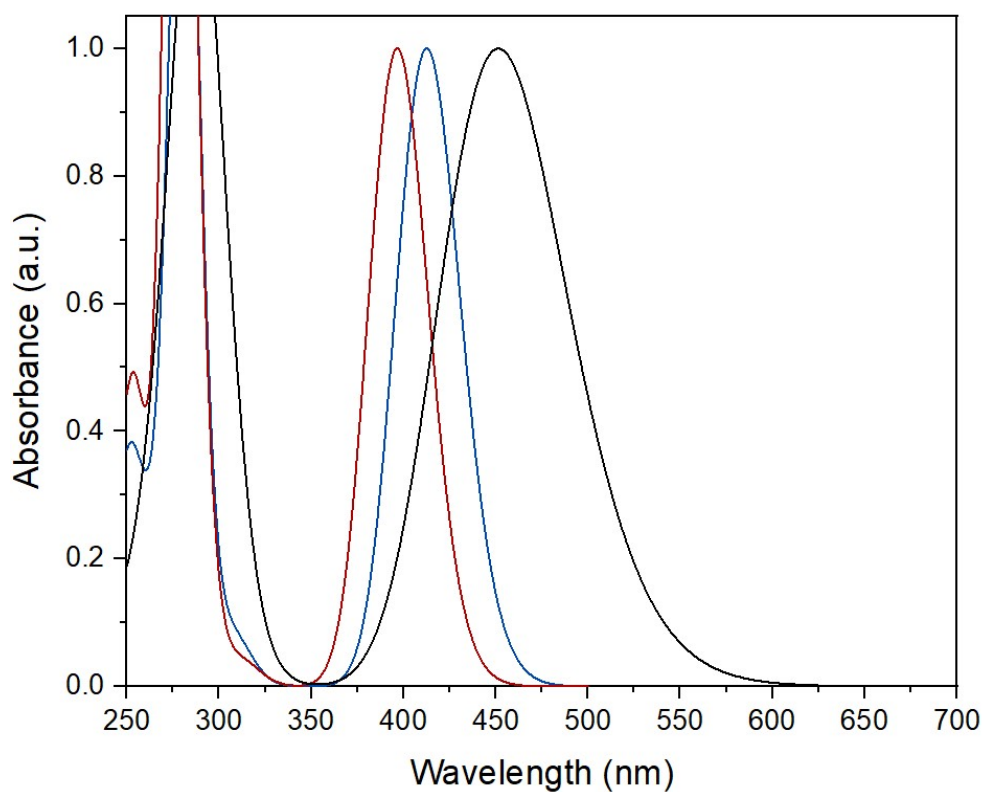

**Figure S20** Normalised theoretical absorption spectra of **Th-BTZ** (black), **Th-BTZ-oPh** (blue) and **Th-BTZ-oPh<sub>2</sub>** (red).

### 5.3 Excited State Orbitals

**Table S5** Hole and particle natural transition orbitals calculated for pH-BTZ.<sup>7</sup>

| State          | Energy (nm)<br>[contribution] | Hole Orbital | Particle Orbital |
|----------------|-------------------------------|--------------|------------------|
| S <sub>1</sub> | 371<br>[0.98888]              |              |                  |
| S <sub>2</sub> | 279<br>[0.90336]              |              |                  |
| S <sub>6</sub> | 252<br>[0.63181]              |              |                  |



**Table S6** Hole and particle natural transition orbitals calculated for pH-BTZ-oPh.

| State          | Energy (nm)<br>[contribution] | Hole Orbital                                                                       | Particle Orbital                                                                    |
|----------------|-------------------------------|------------------------------------------------------------------------------------|-------------------------------------------------------------------------------------|
| S <sub>1</sub> | 362<br>[0.98812]              | 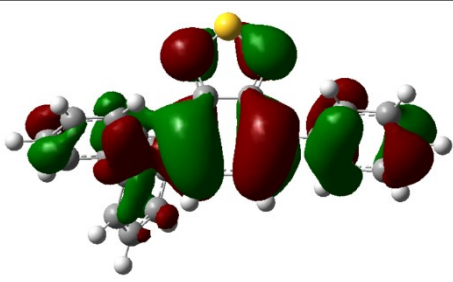  |   |
| S <sub>2</sub> | 279<br>[0.91928]              |   |   |
| S <sub>6</sub> | 249<br>[0.68723]              |  |  |

**Table S7** Hole and particle natural transition orbitals calculated for **pH-BTZ-oPh<sub>2</sub>**.<sup>7</sup>

| State          | Energy (nm)<br>[contribution] | Hole Orbital                                                                       | Particle Orbital                                                                    |
|----------------|-------------------------------|------------------------------------------------------------------------------------|-------------------------------------------------------------------------------------|
| S <sub>1</sub> | 346<br>[0.98655]              | 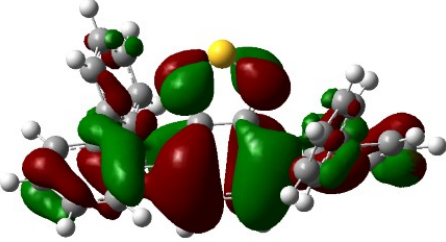  |   |
| S <sub>2</sub> | 287<br>[0.95319]              |   |   |
| S <sub>4</sub> | 275<br>[0.92758]              |  |  |

**Table S8** Hole and particle natural transition orbitals calculated for **Th-BTZ**.<sup>7</sup>

| State          | Energy (nm)<br>[contribution] | Hole Orbital                                                                        | Particle Orbital                                                                     |
|----------------|-------------------------------|-------------------------------------------------------------------------------------|--------------------------------------------------------------------------------------|
| S <sub>1</sub> | 452<br>[0.98710]              | 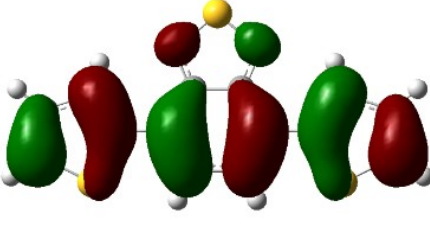 |  |
| S <sub>3</sub> | 288<br>[0.91296]              |  |  |

**Table S9** Hole and particle natural transition orbitals calculated for **Th-BTZ-oPh**.

| State          | Energy (nm)<br>[contribution] | Hole Orbital                                                                        | Particle Orbital                                                                     |
|----------------|-------------------------------|-------------------------------------------------------------------------------------|--------------------------------------------------------------------------------------|
| S <sub>1</sub> | 413<br>[0.98475]              | 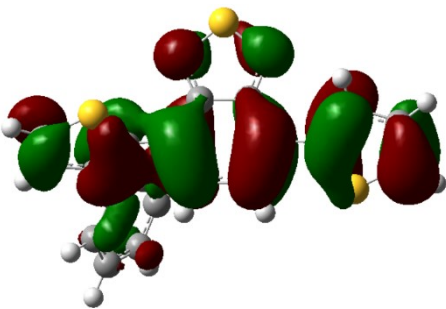   |    |
| S <sub>3</sub> | 283<br>[0.85236]              |    |    |
| S <sub>4</sub> | 281<br>[0.69175]              |   |   |
| S <sub>5</sub> | 276<br>[0.79337]              |  |  |

Table S9 (cont) Hole and particle natural transition orbitals calculated for Th-BTZ-oPh.

$S_8$ 251  
[0.49576]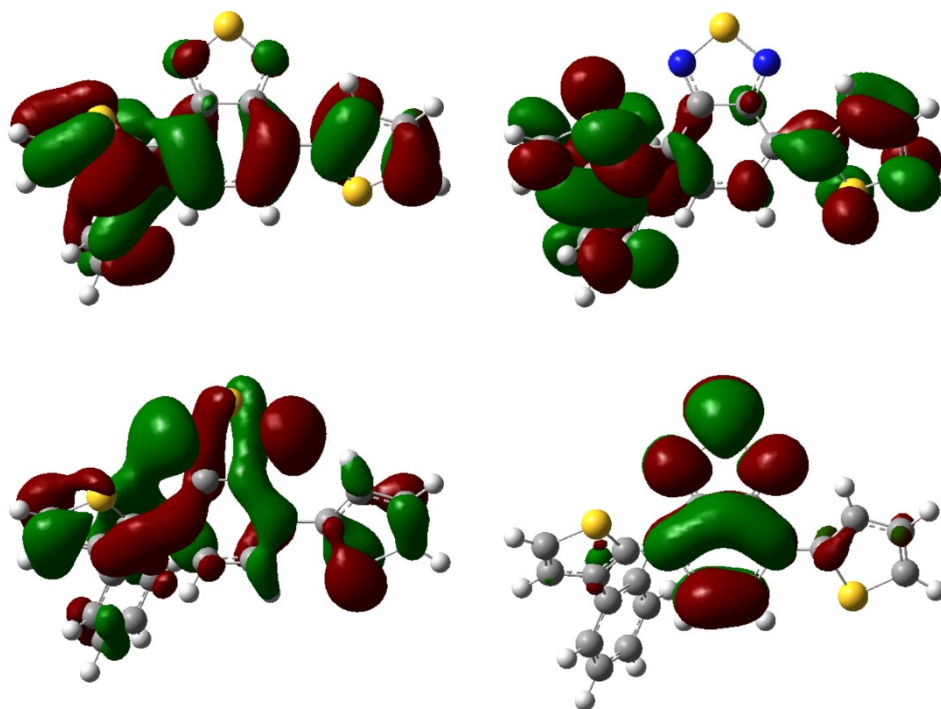**Table S10** Hole and particle natural transition orbitals calculated for **Th-BTZ-oPh<sub>2</sub>**.

| State          | Energy (nm)<br>[contribution] | Hole Orbital                                                                        | Particle Orbital                                                                     |
|----------------|-------------------------------|-------------------------------------------------------------------------------------|--------------------------------------------------------------------------------------|
| S <sub>1</sub> | 397<br>[0.98246]              | 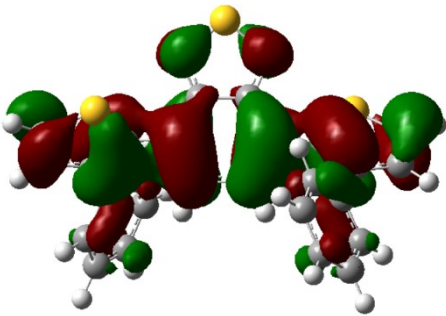   |    |
| S <sub>4</sub> | 282<br>[0.90286]              |    |    |
| S <sub>5</sub> | 279<br>[0.93654]              |   |   |
| S <sub>6</sub> | 276<br>[0.7451]               |  |  |

## 5.4 Energy Barriers to Bond Rotation

D-A Torsion Angle = 0°

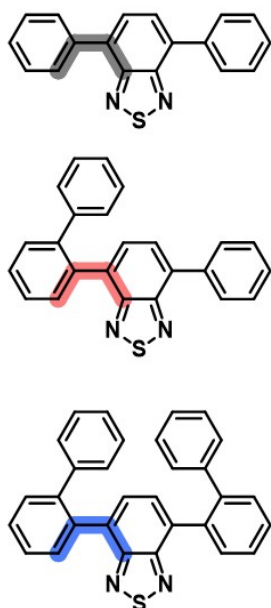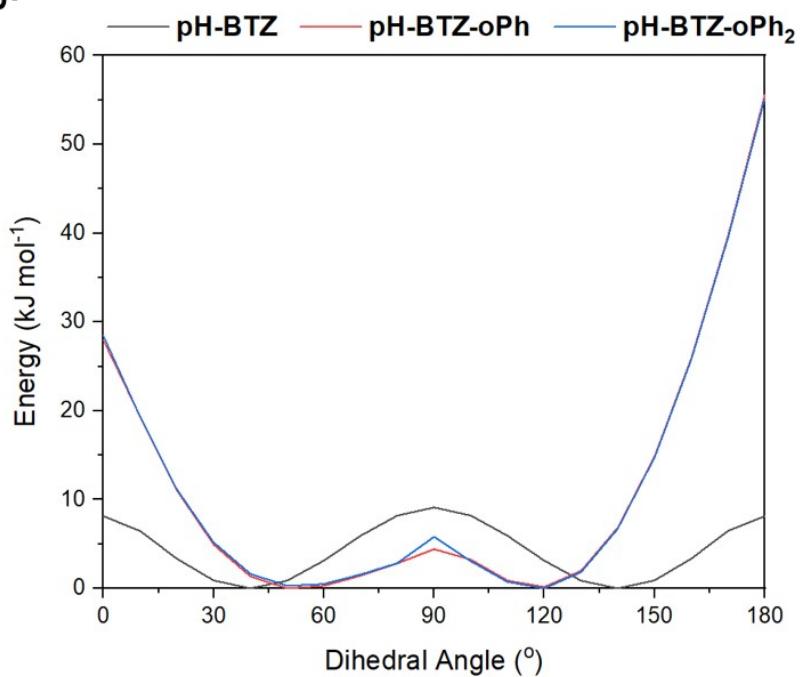

Figure S21 Energy barriers for rotation about the highlighted torsion angle for **pH-BTZ** (black), **pH-BTZ-oPh** (red) and **pH-BTZ-oPh<sub>2</sub>** (blue).

D-A Torsion Angle = 0°

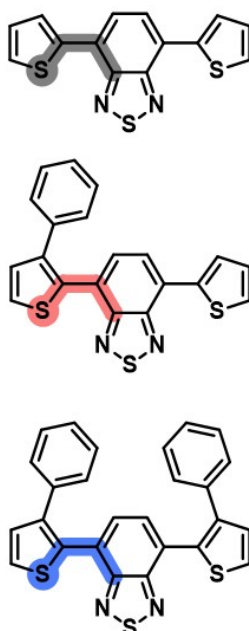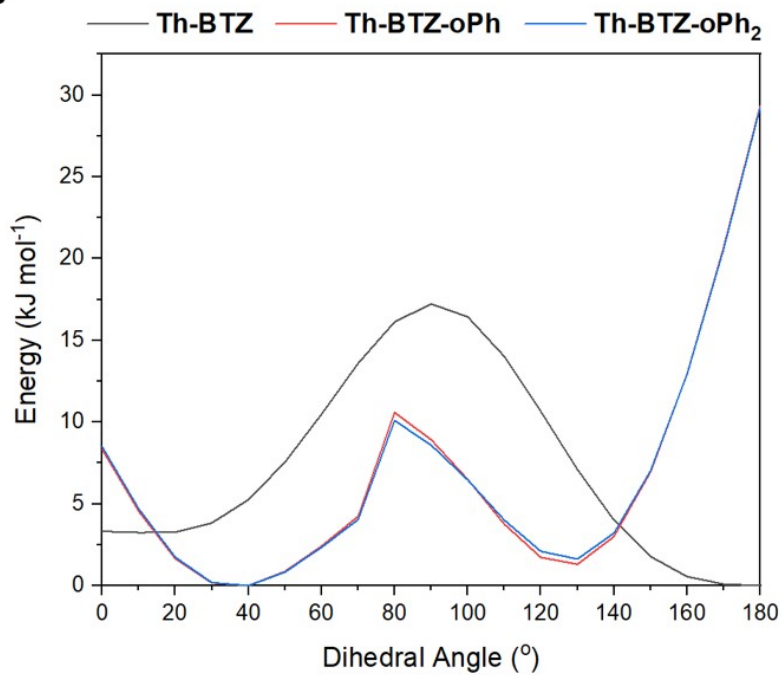

Figure S22 Energy barriers for rotation about the highlighted torsion angle for **Th-BTZ** (black), **Th-BTZ-oPh** (red) and **Th-BTZ-oPh<sub>2</sub>** (blue).

## 6. Characterisation of Products

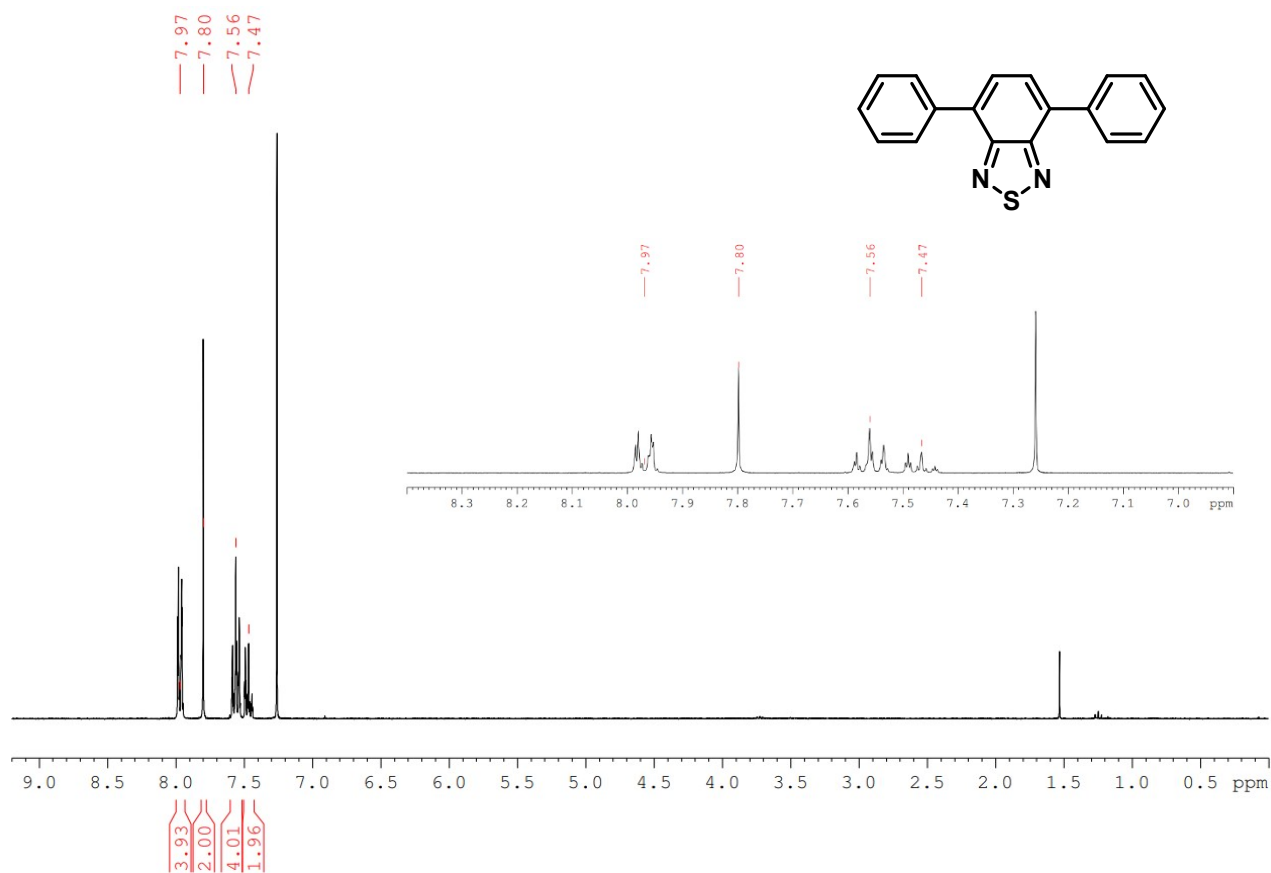4,7-Diphenylbenzo[*c*][1,2,5]thiadiazole (pH-BTZ)Figure S23  $^1\text{H}$  NMR of pH-BTZ.

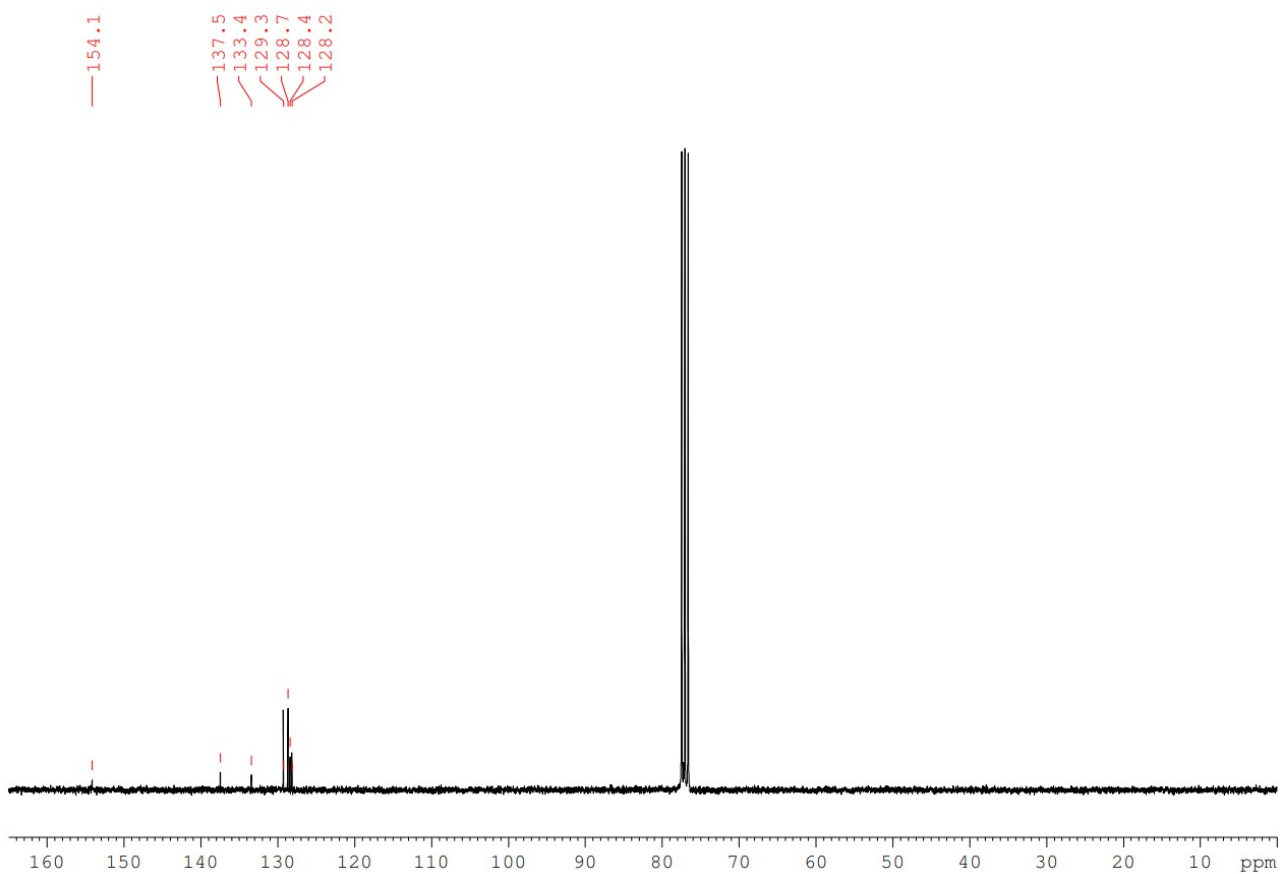Figure S24  $^{13}\text{C}$  NMR of pH-BTZ.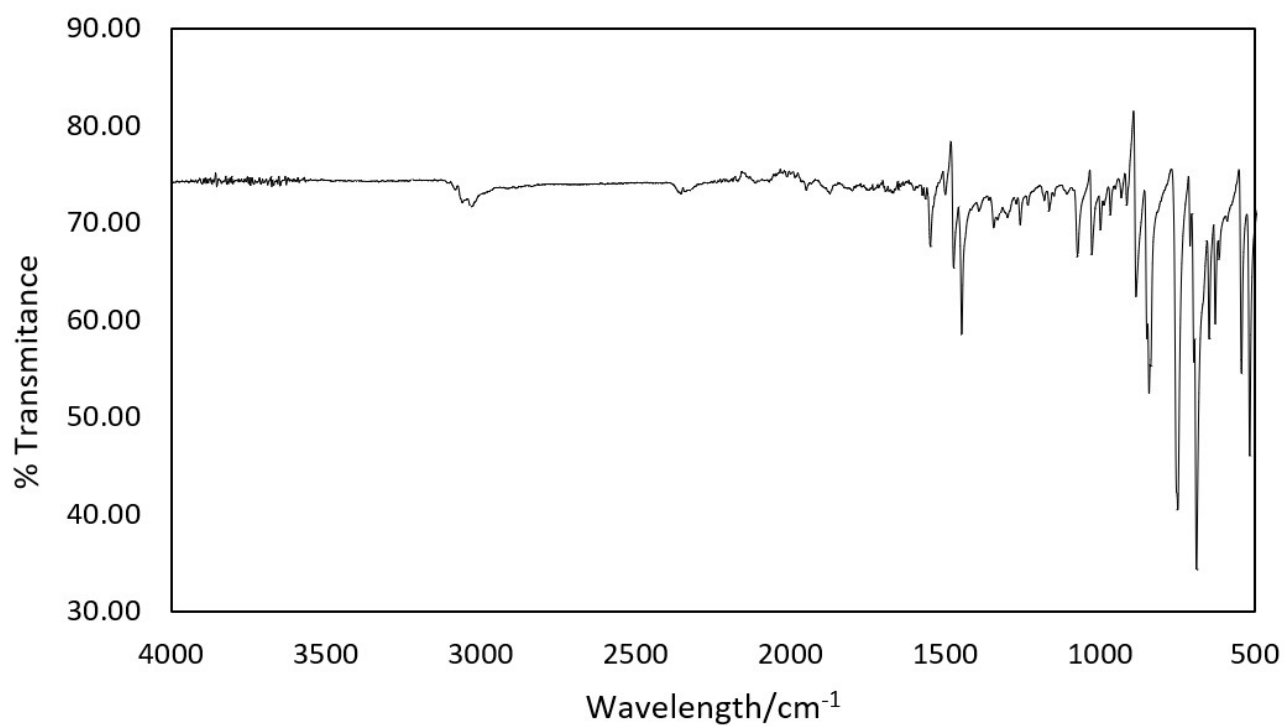

Figure S25 IR spectra of pH-BTZ.





pH-BTZ-BCl<sub>2</sub>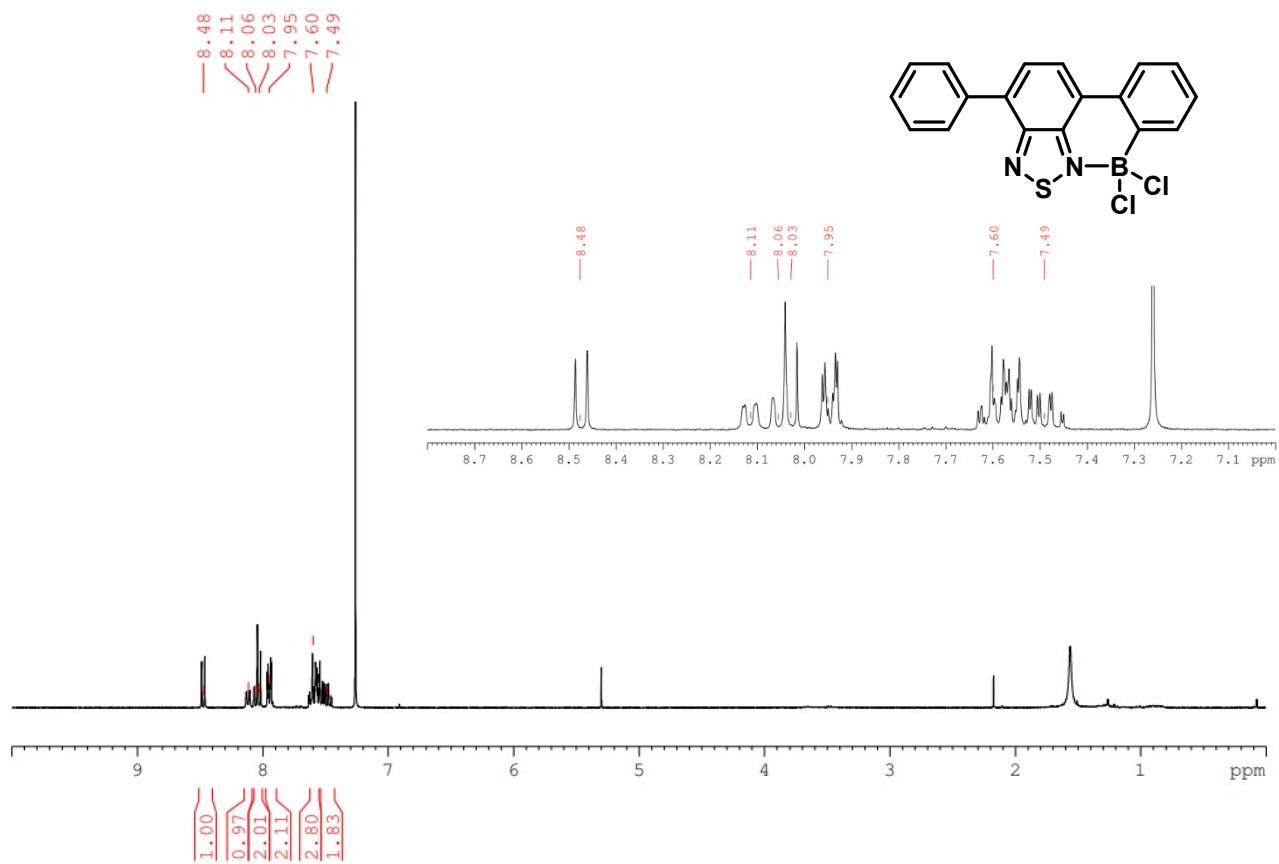Figure S26 <sup>1</sup>H NMR spectra of pH-BTZ-BCl<sub>2</sub>.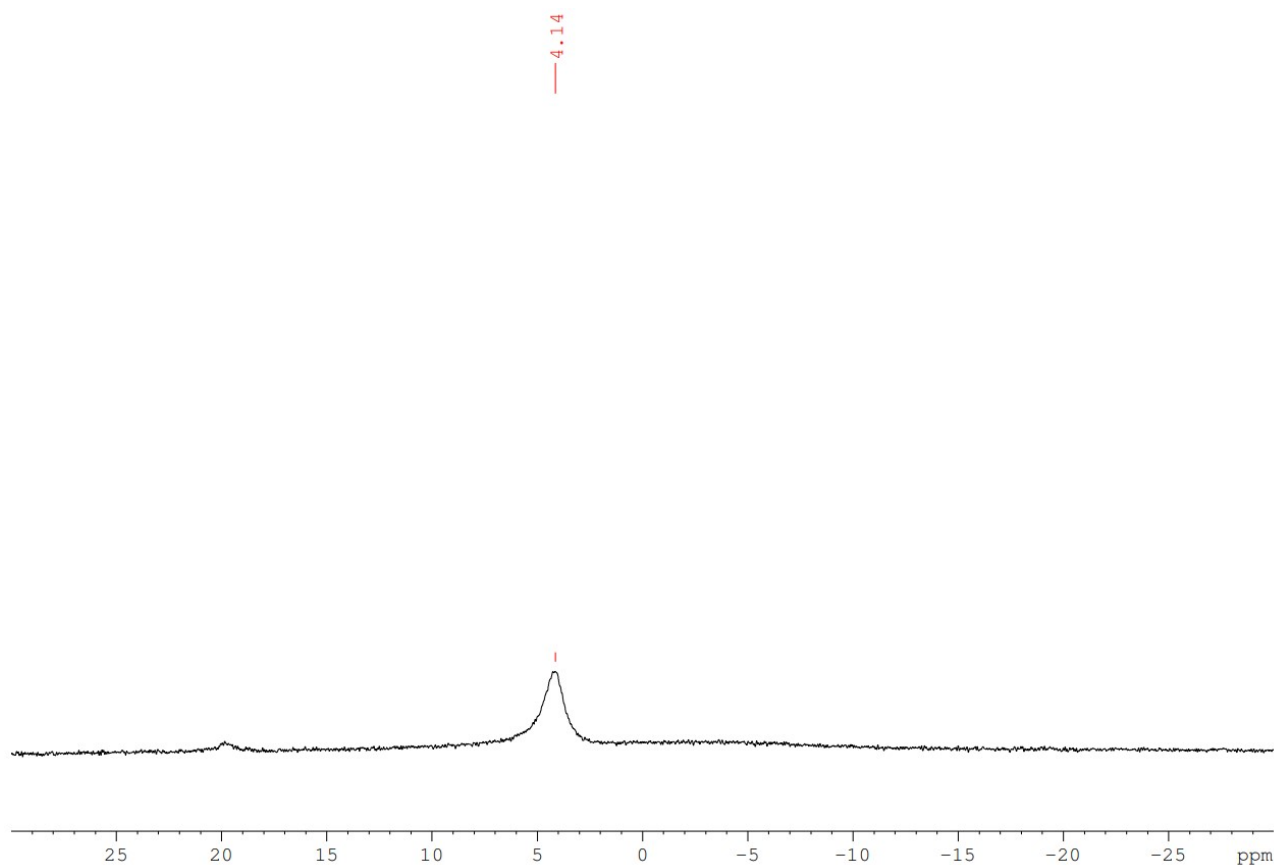Figure S27 <sup>11</sup>B NMR of pH-BTZ-BCl<sub>2</sub>.

## 4-([1,1'-Biphenyl]-2-yl)-7-phenylbenzo[c][1,2,5]thiadiazole (pH-BTZ-oPh)

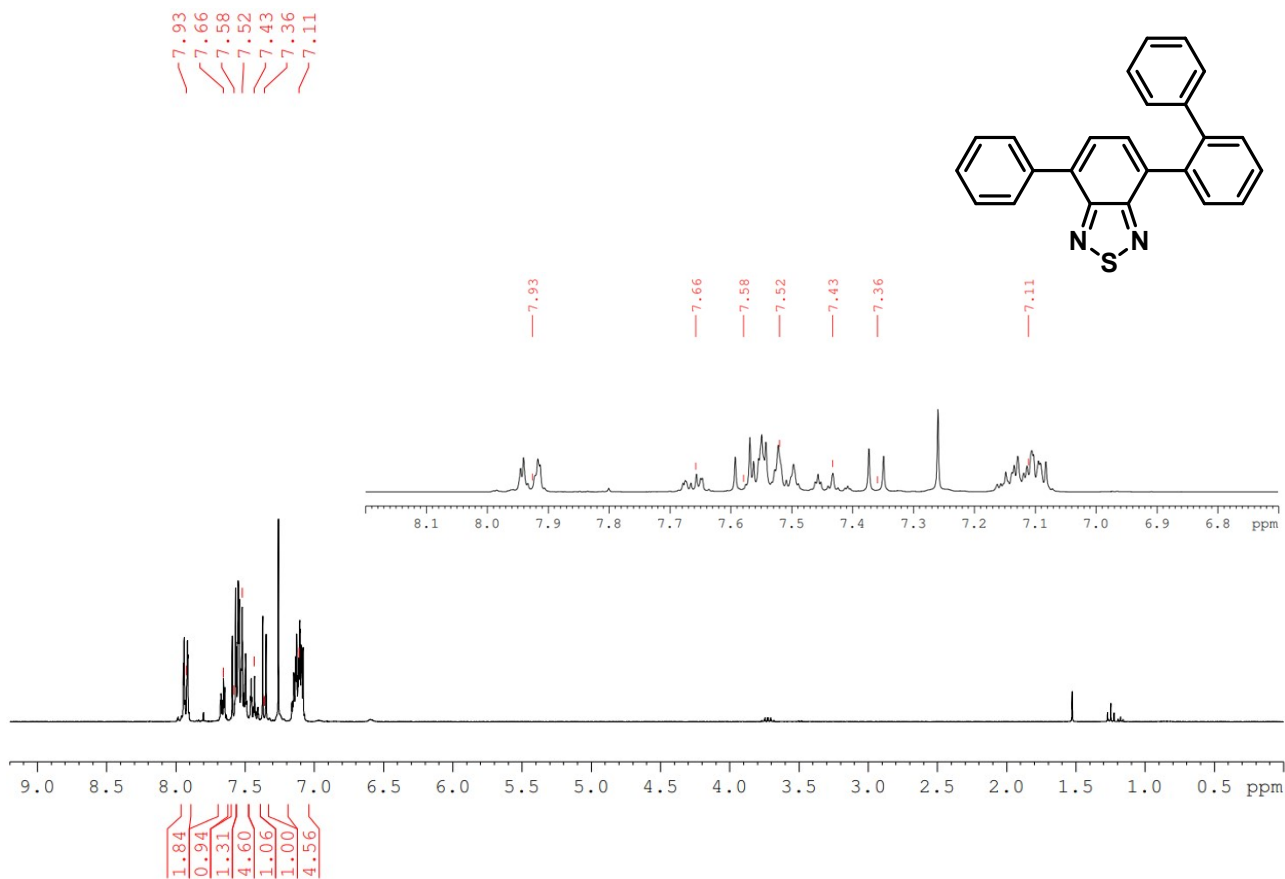Figure S28 <sup>1</sup>H NMR of pH-BTZ-oPh.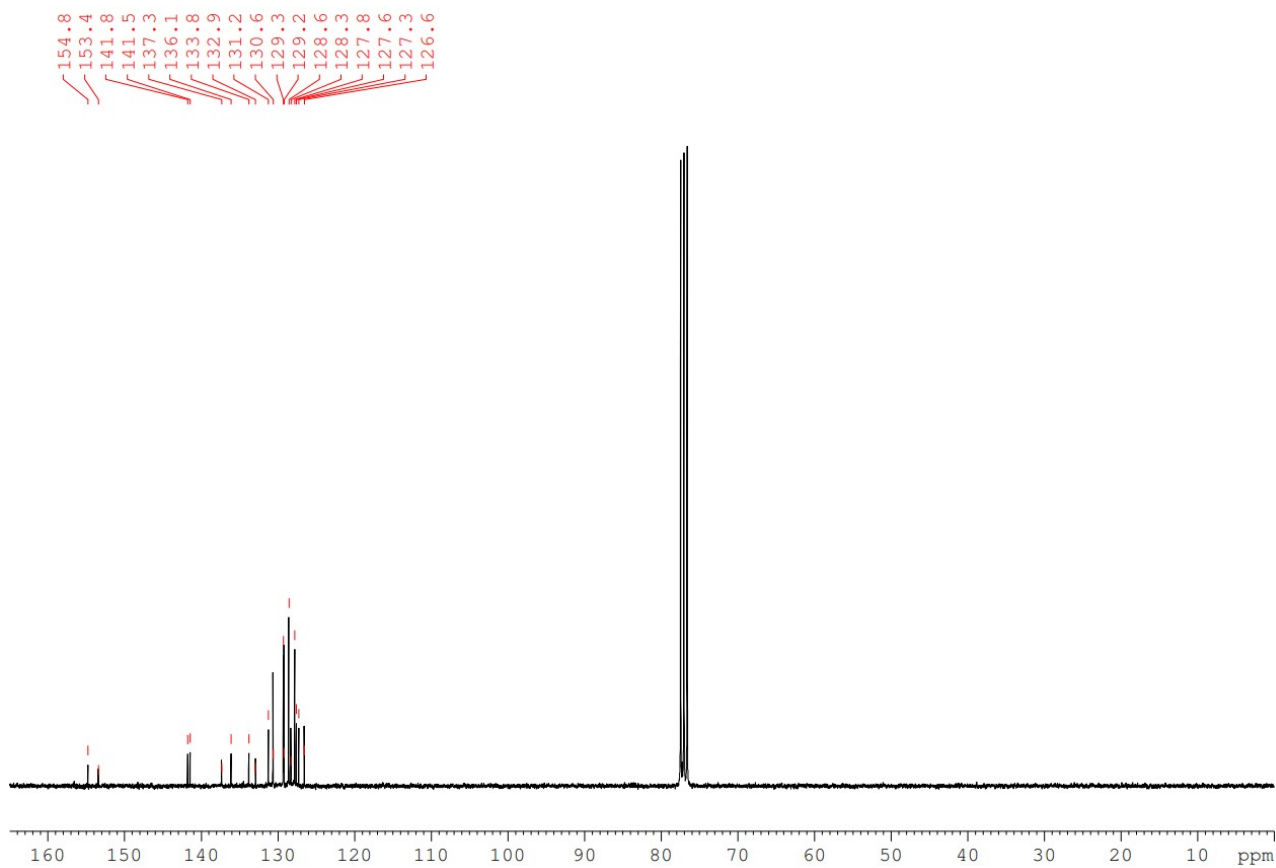Figure S29 <sup>13</sup>C NMR of pH-BTZ-oPh.

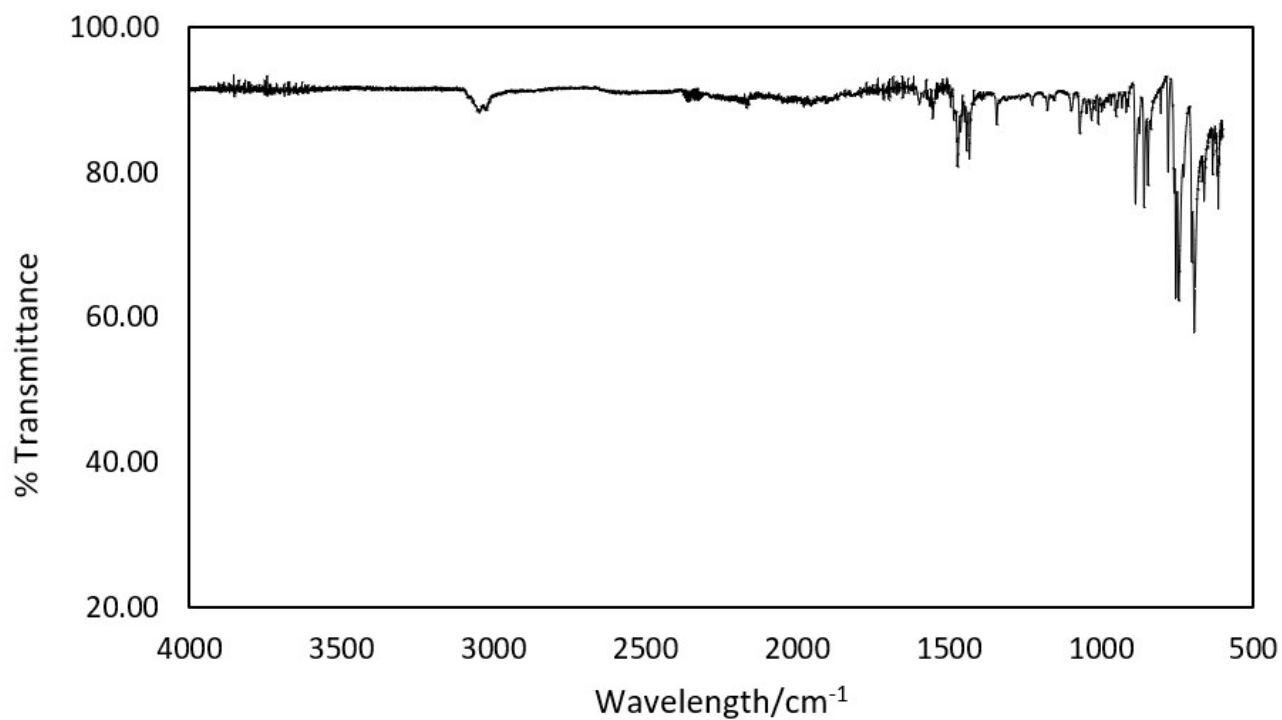

**Figure S30** IR spectra of **pH-BTZ-oPh**.

4,7-Di([1,1'-biphenyl]-2-yl)benzo[c][1,2,5]thiadiazole (pH-BTZ-oPh<sub>2</sub>)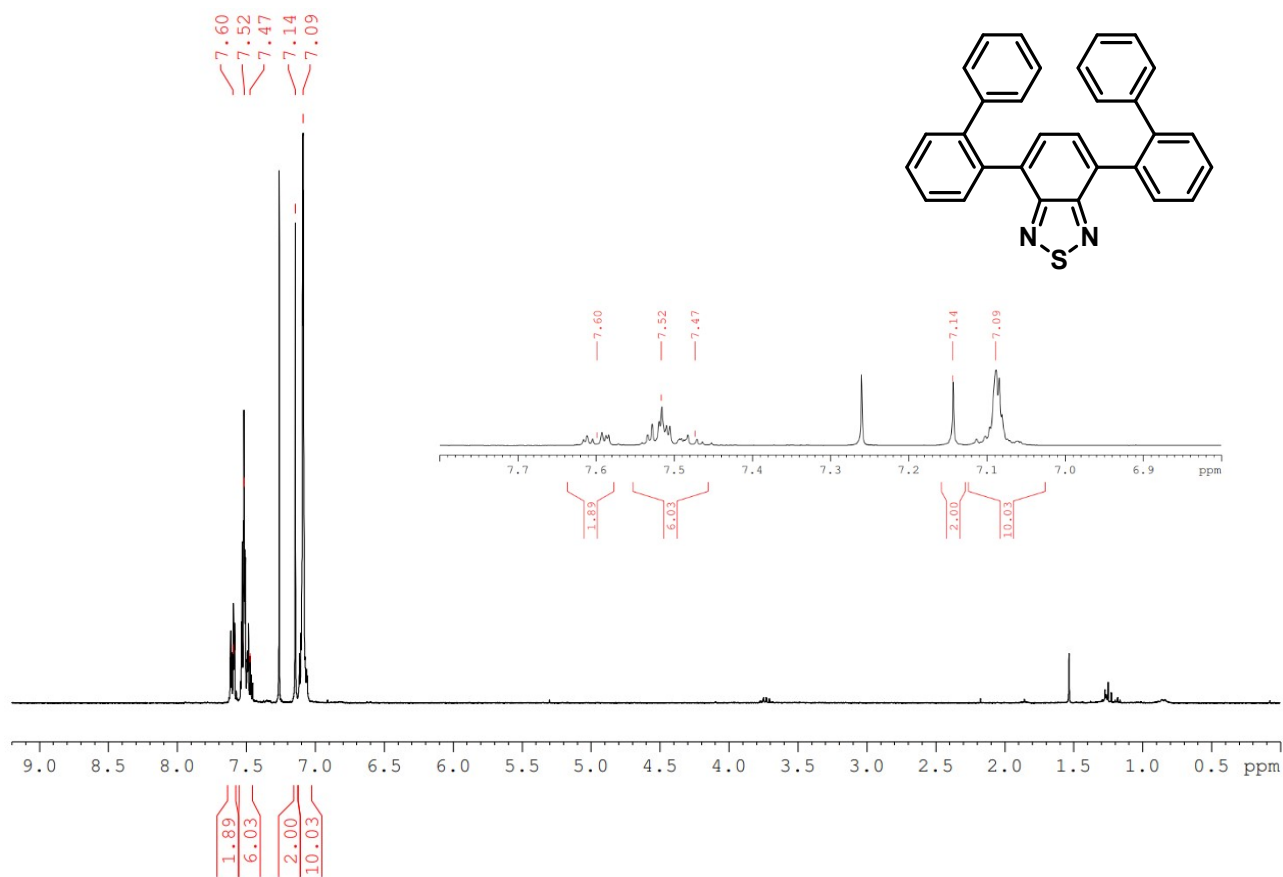Figure S31 <sup>1</sup>H NMR of pH-BTZ-oPh<sub>2</sub>.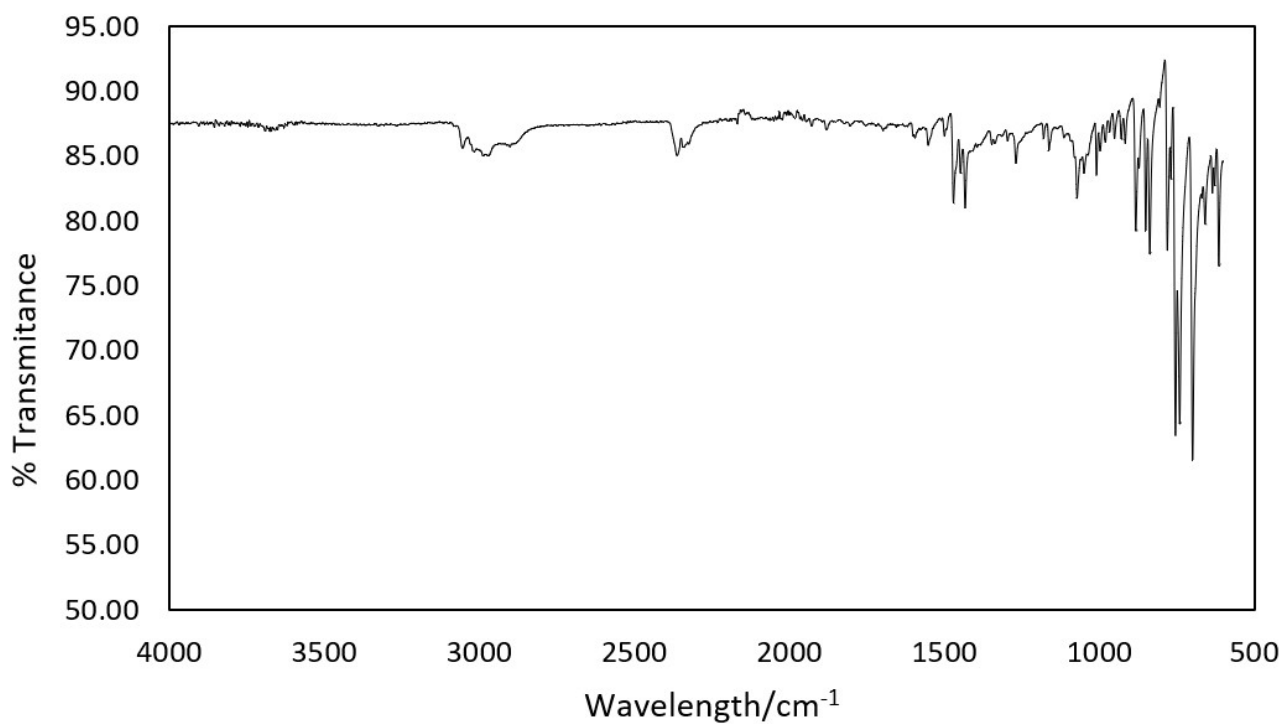Figure S32 IR spectra of pH-BTZ-oPh<sub>2</sub>.

## 4,7-Di(thiophen-2-yl)benzo[c][1,2,5]thiadiazole (Th-BTZ)

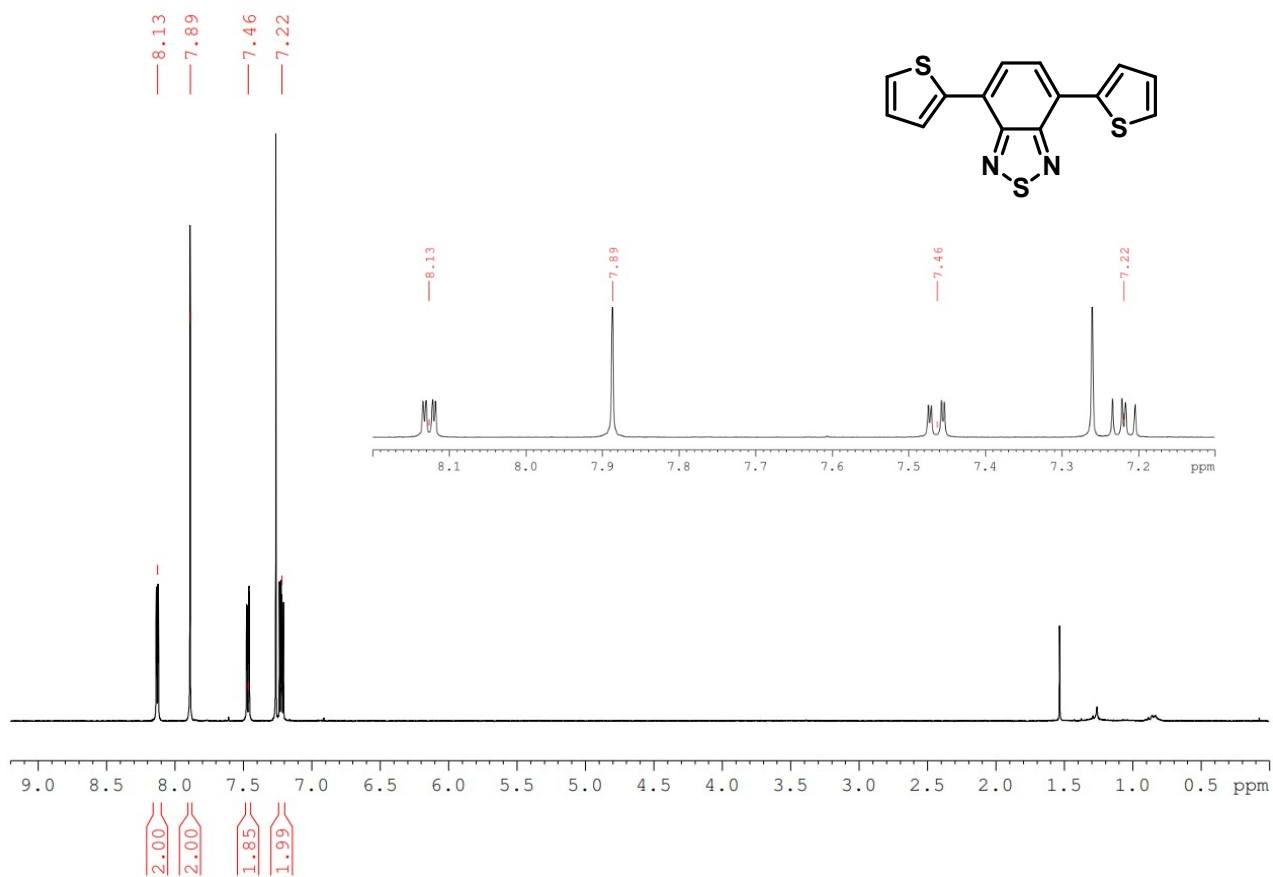Figure S33 <sup>1</sup>H NMR of Th-BTZ.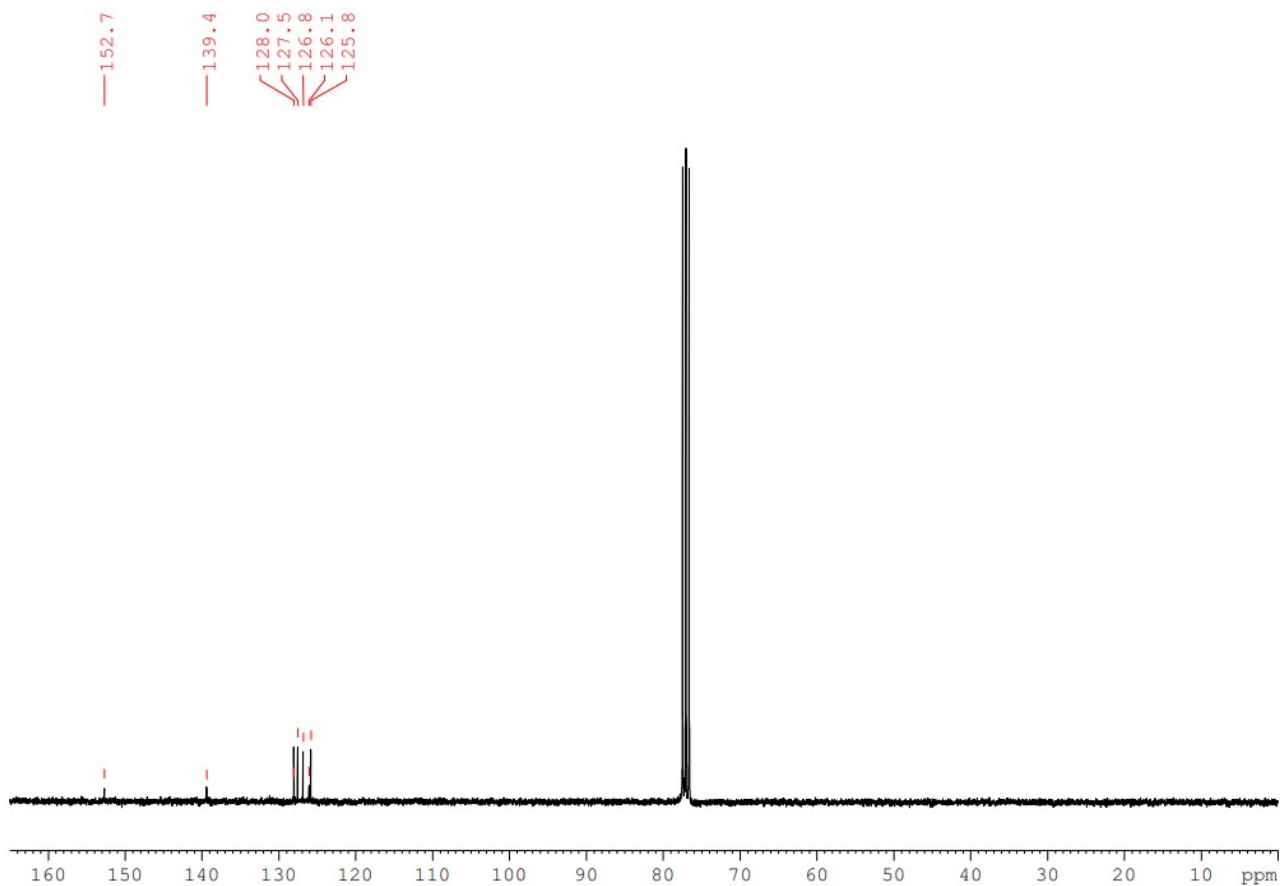Figure S34 <sup>13</sup>C NMR of Th-BTZ.

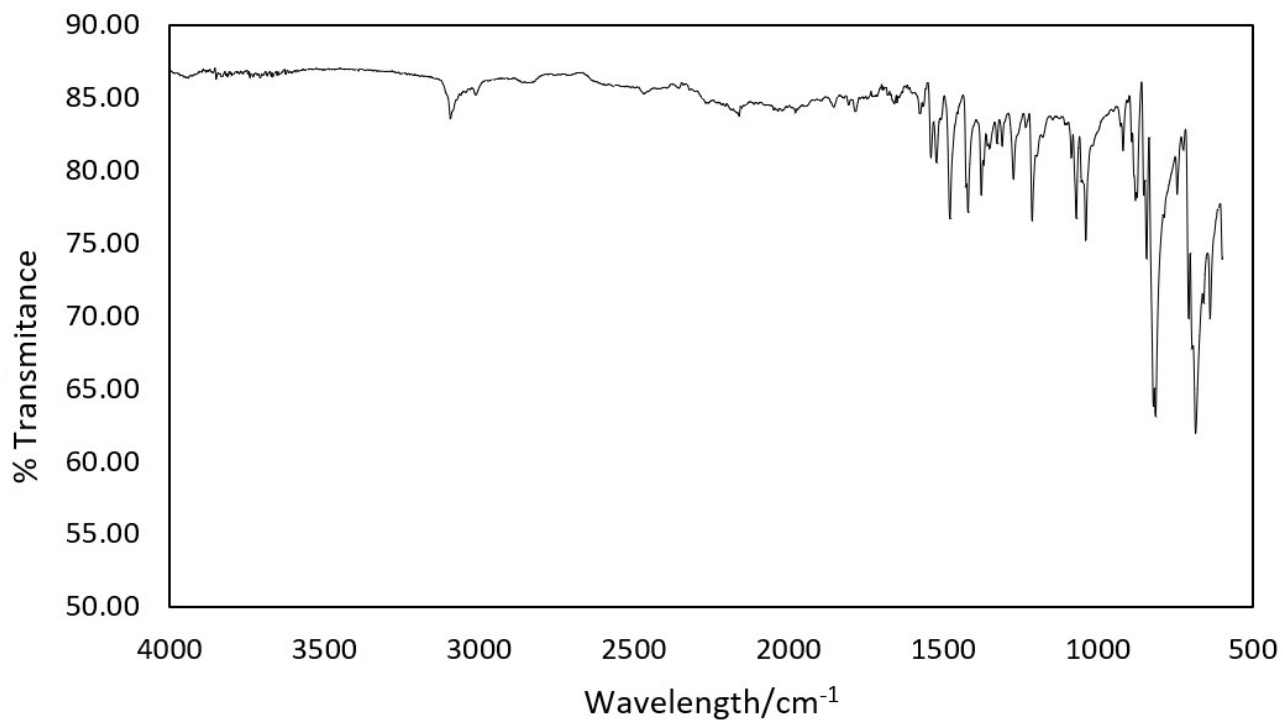

**Figure S35** IR spectra of **Th-BTZ**.

Th-BTZ- $\text{BCl}_2$ 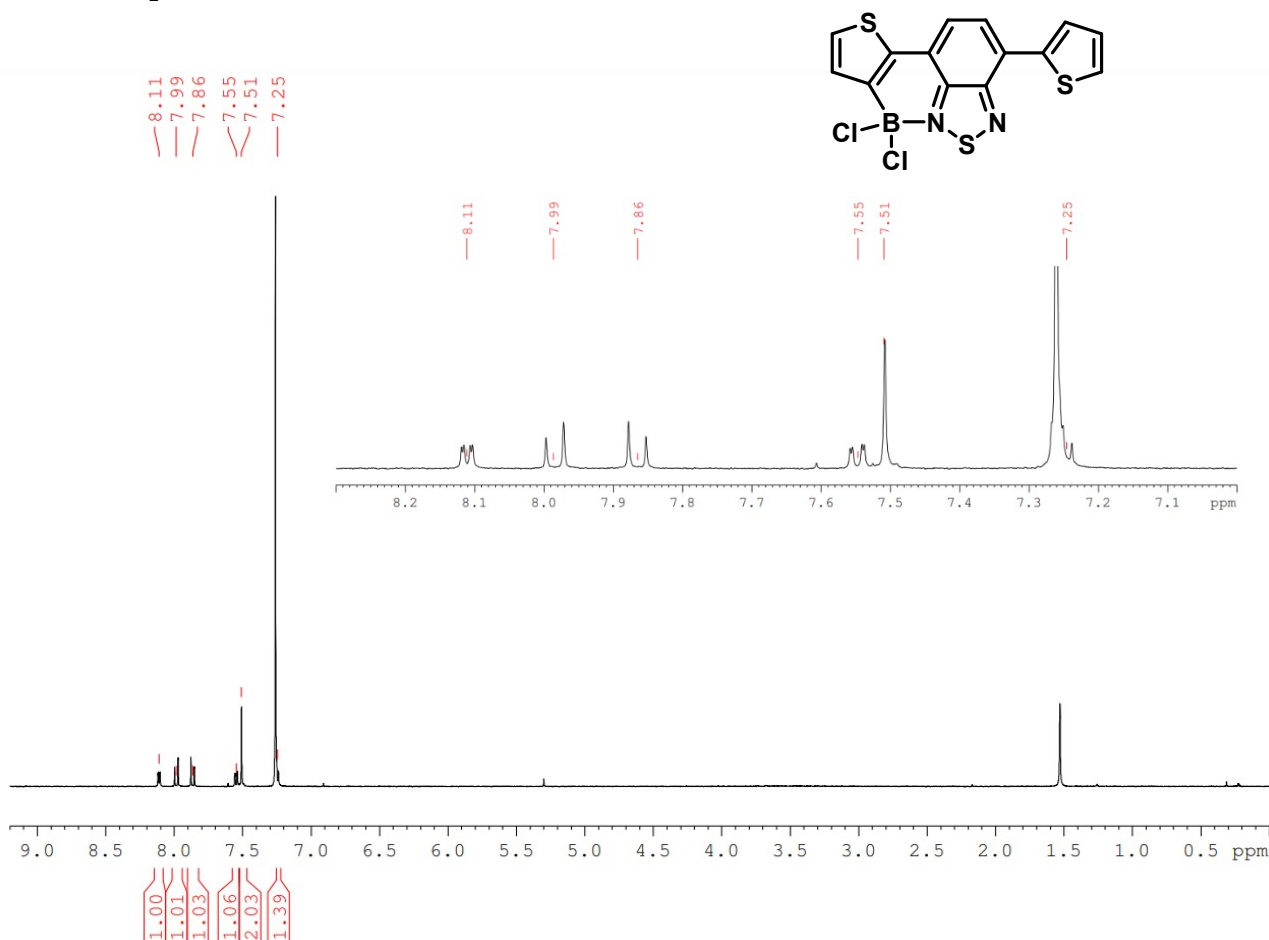Figure S36  $^1\text{H}$  NMR of Th-BTZ- $\text{BCl}_2$ .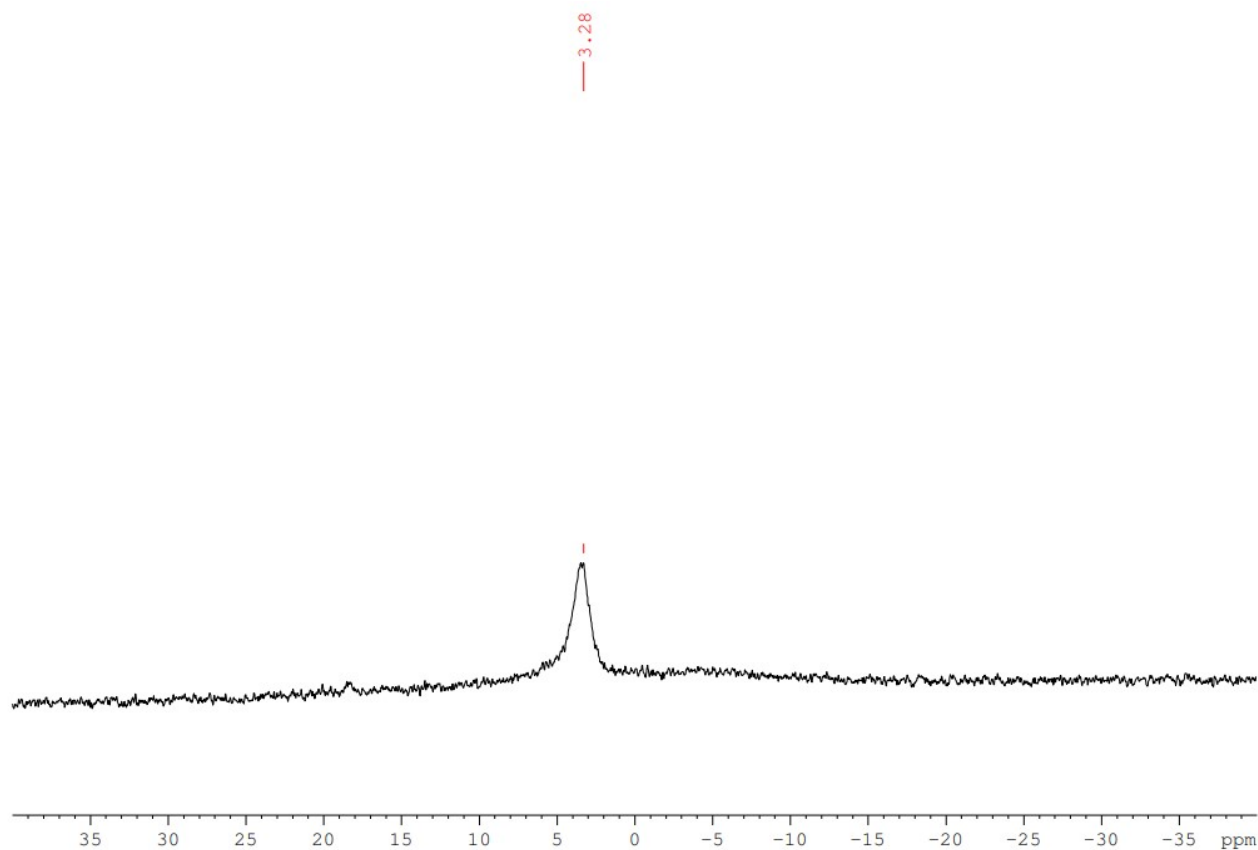Figure S37  $^{11}\text{B}$  NMR of Th-BTZ- $\text{BCl}_2$ .



4-(3-Phenylthiophen-2-yl)-7-(thiophen-2-yl)benzo[*c*][1,2,5]thiadiazole (Th-BTZ-oPh)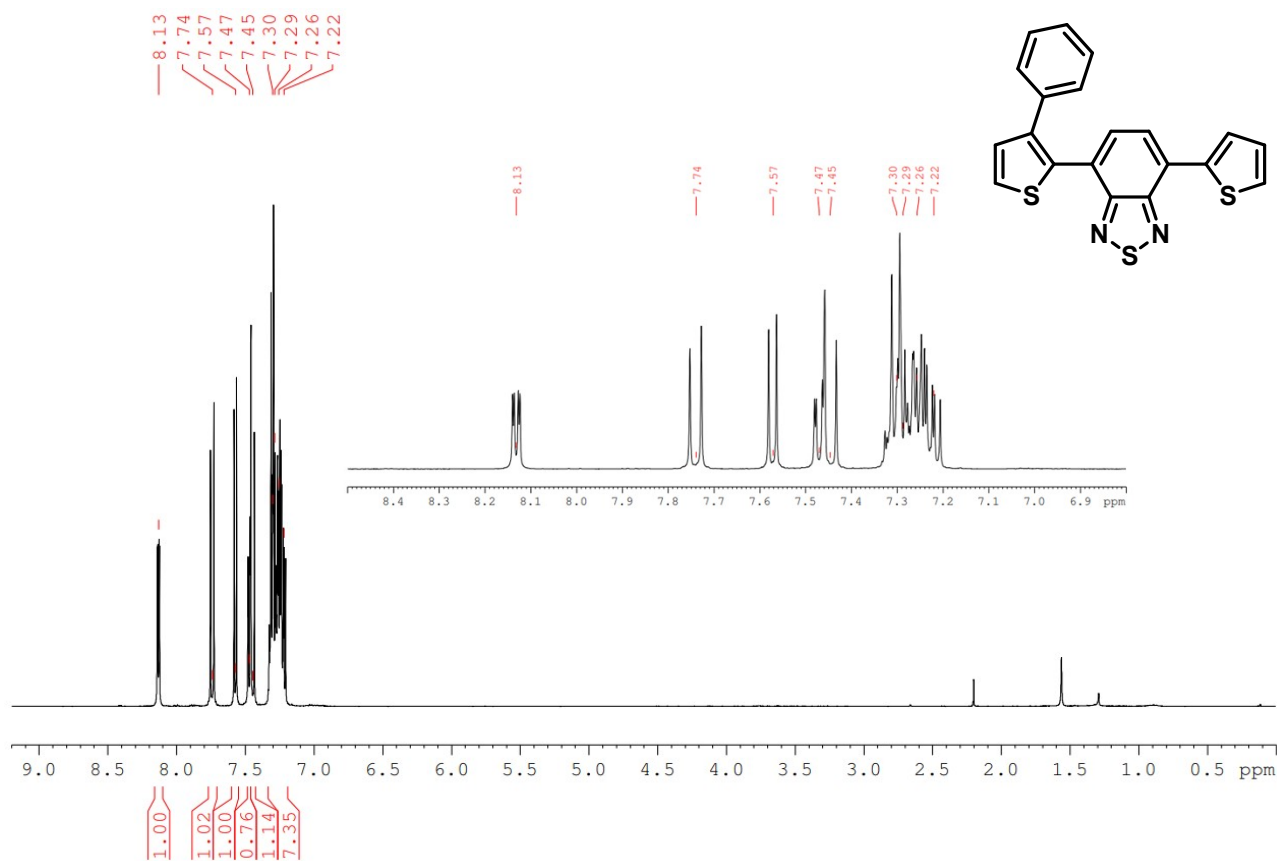Figure S38 <sup>1</sup>H NMR of Th-BTZ-oPh.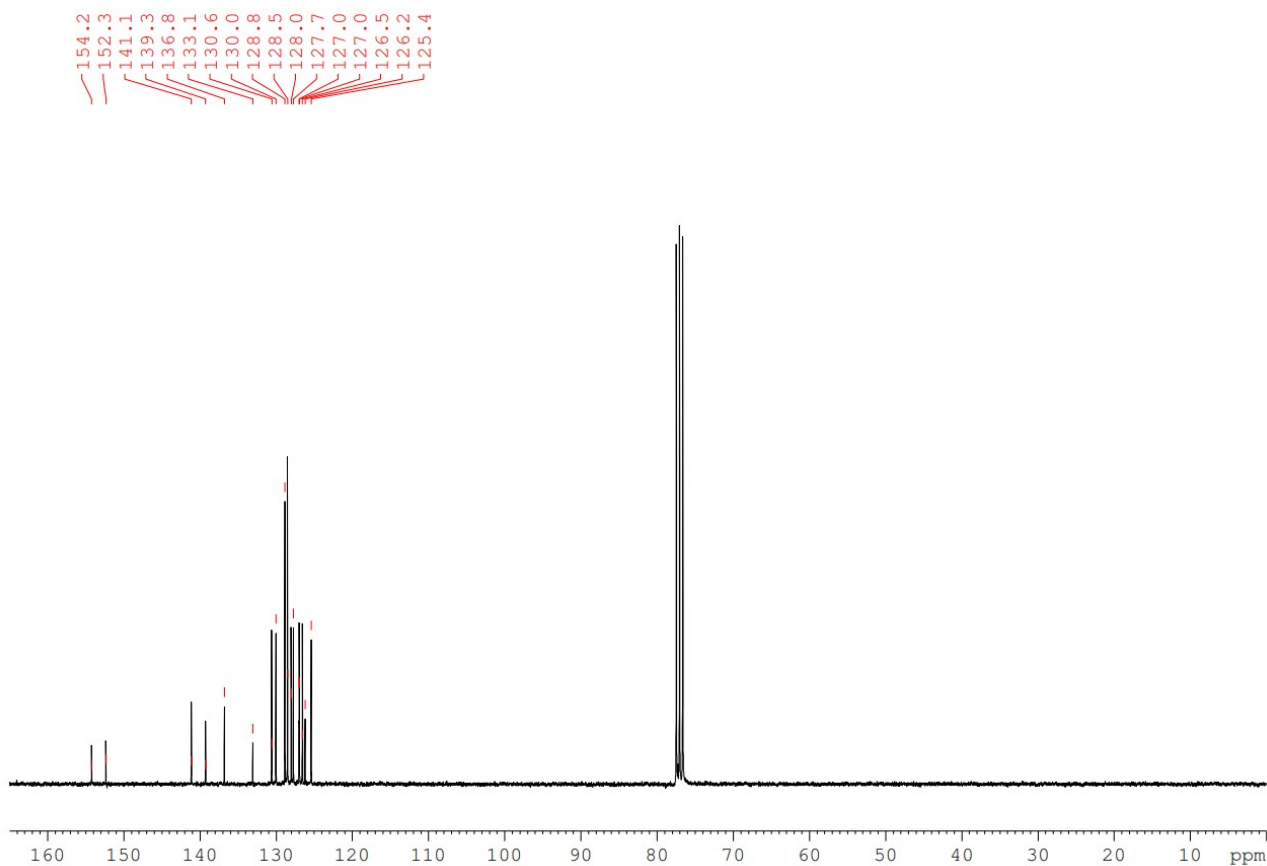Figure S39 <sup>13</sup>C NMR of Th-BTZ-oPh.

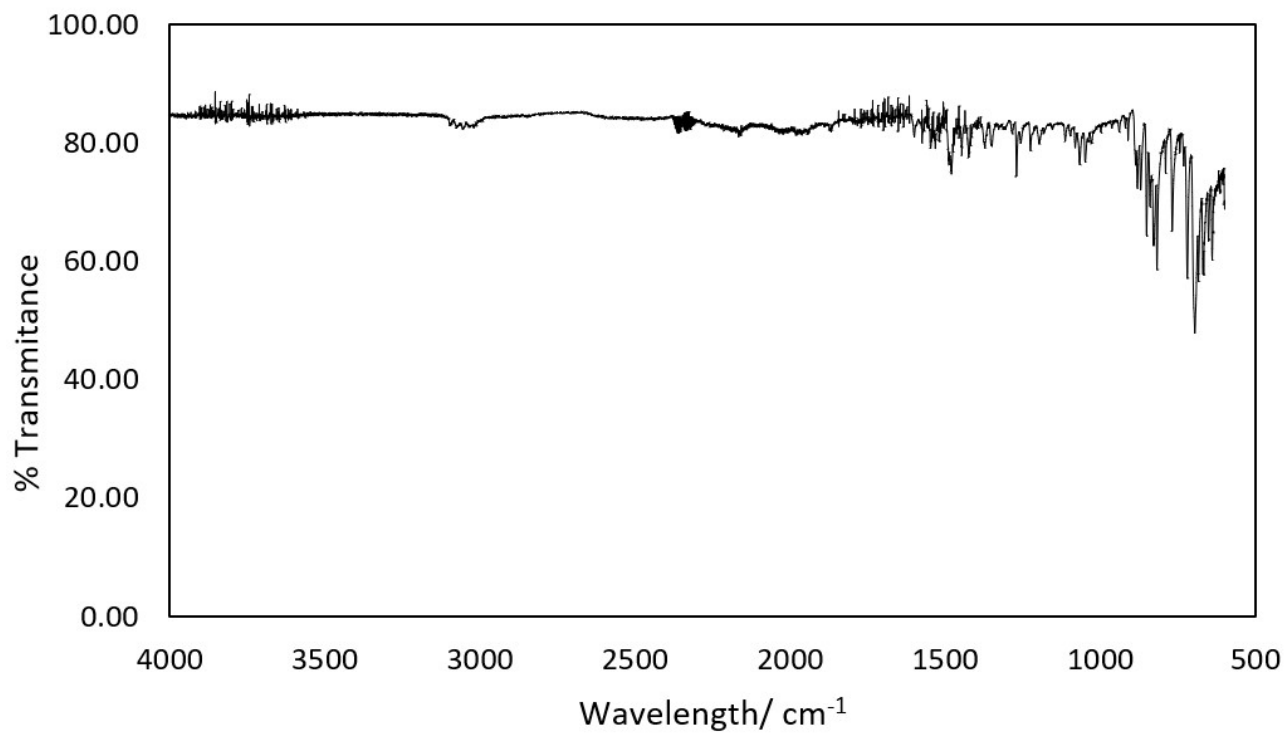

**Figure S40** IR spectra of Th-BTZ-oPh.

**4,7-Bis(3-phenylthiophen-2-yl)benzo[*c*][1,2,5]thiadiazole (ThPh-BTZ-BCl<sub>2</sub>)**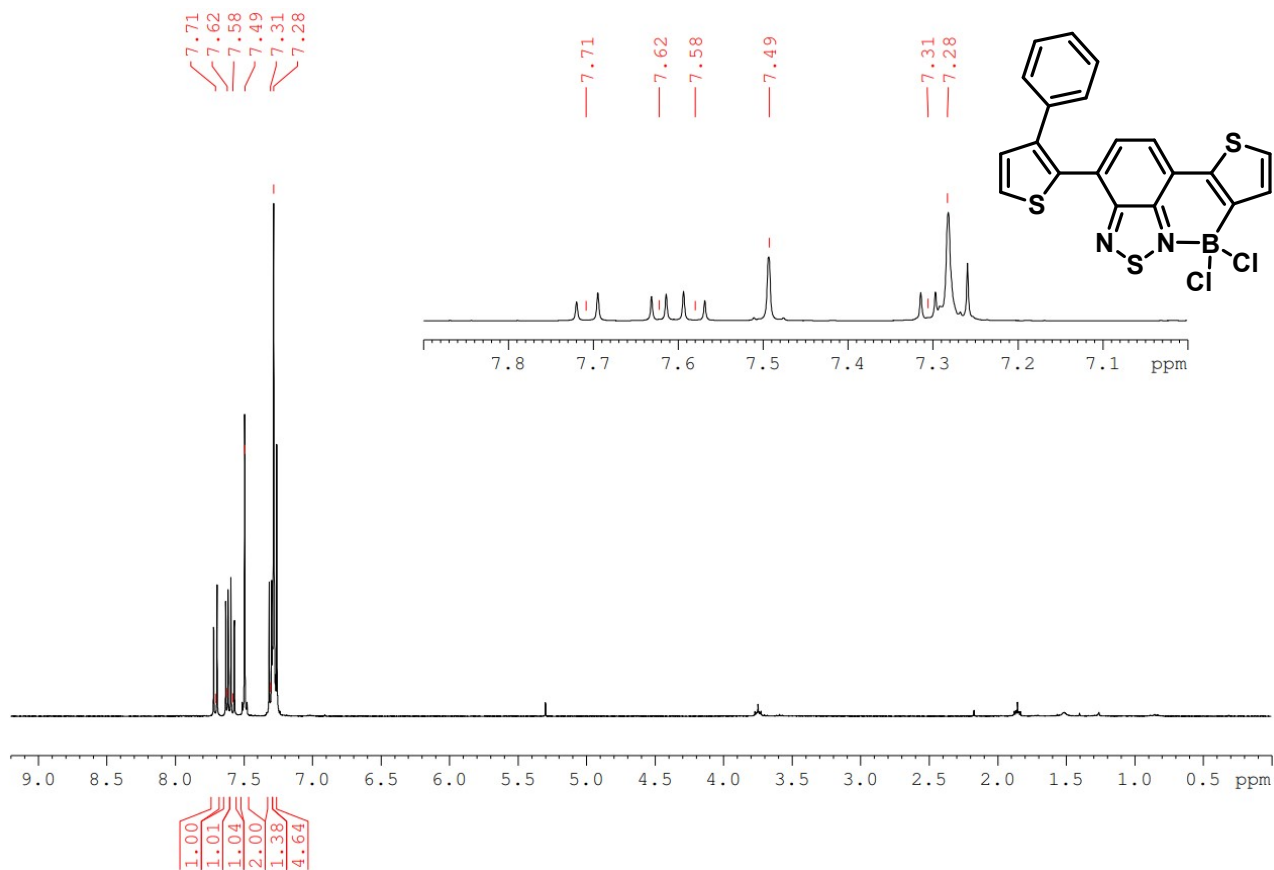**Figure S41** <sup>1</sup>H NMR of ThPh-BTZ-BCl<sub>2</sub>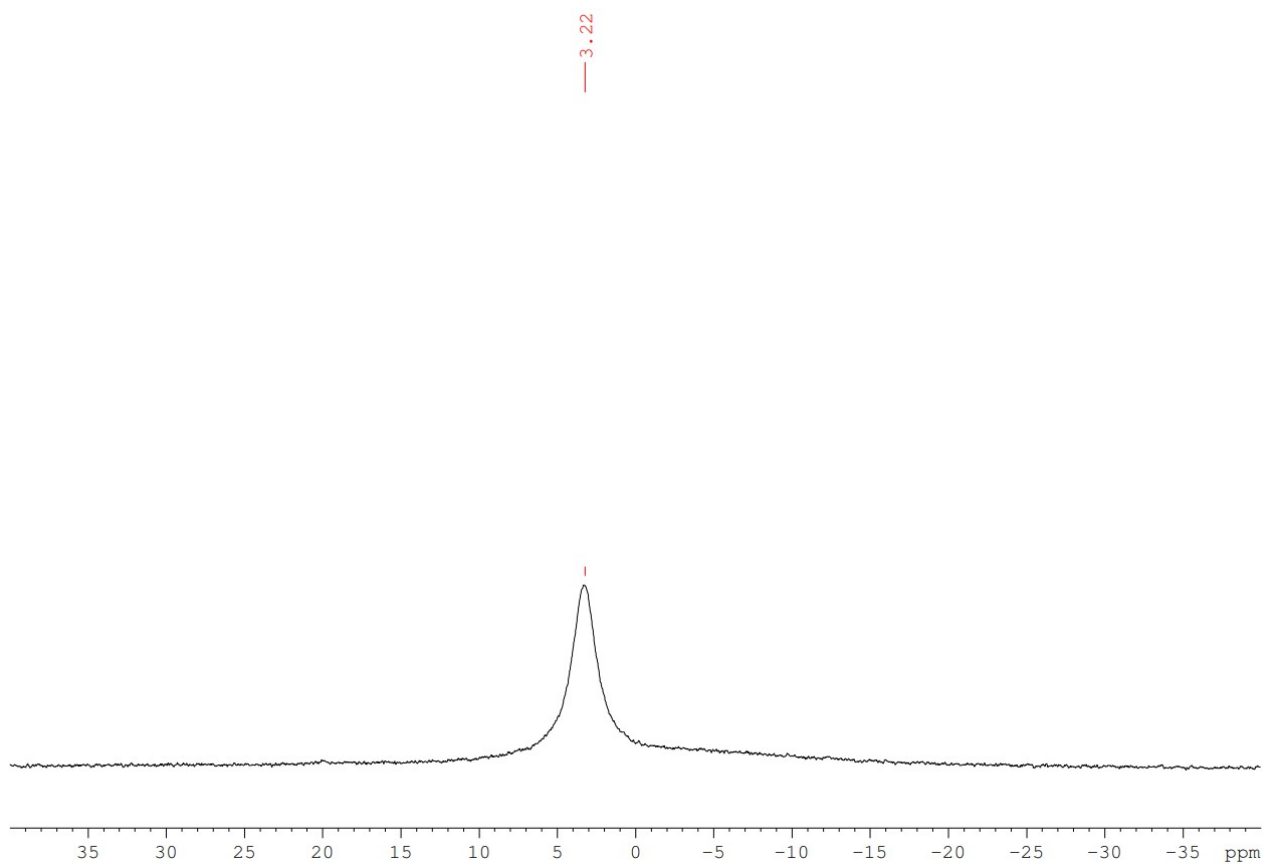**Figure S42** <sup>11</sup>B NMR of ThPh-BTZ-BCl<sub>2</sub>

**4,7-Bis(3-phenylthiophen-2-yl)benzo[c][1,2,5]thiadiazole (Th-BTZ-oPh<sub>2</sub>)**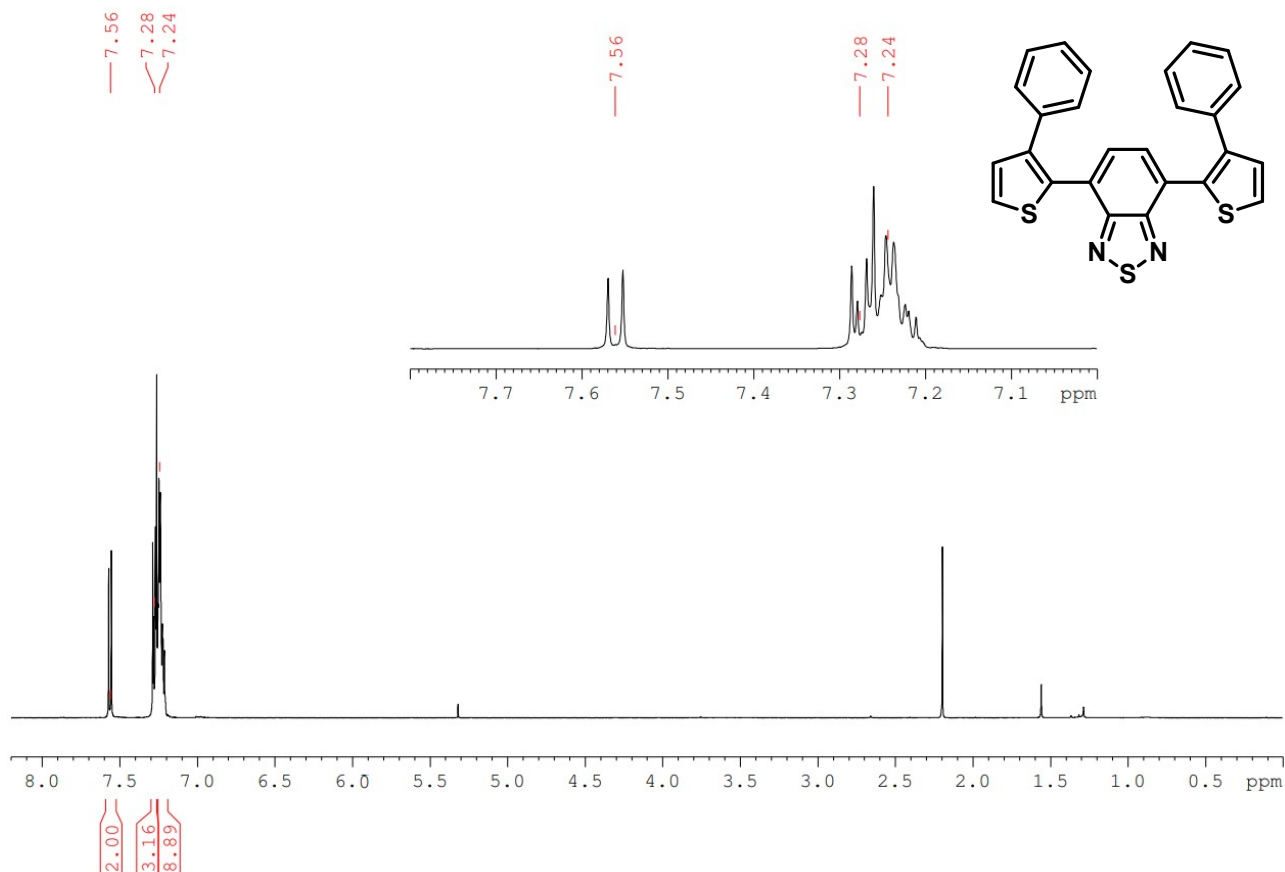**Figure S43** <sup>1</sup>H NMR of Th-BTZ-oPh<sub>2</sub>.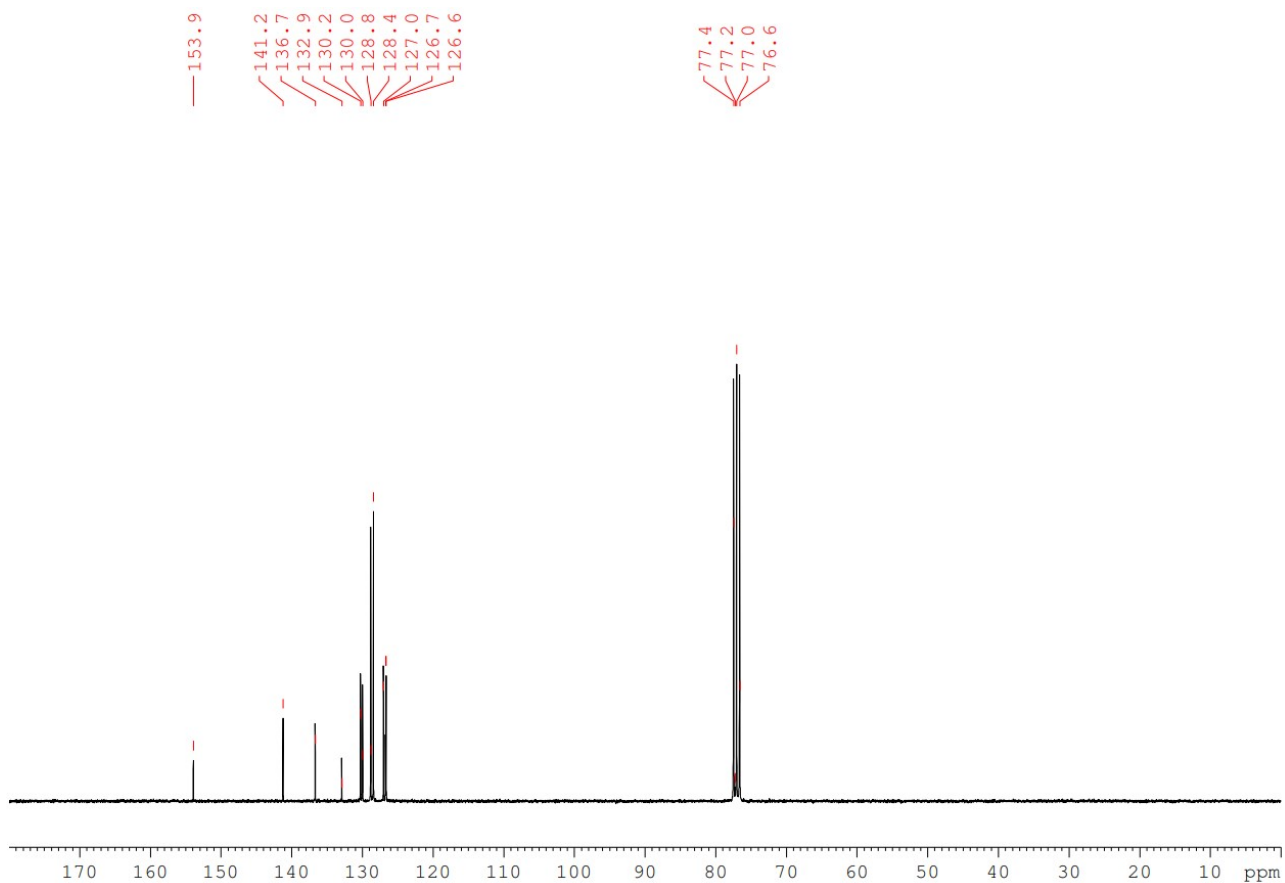**Figure S44** <sup>13</sup>C NMR of Th-BTZ-oPh<sub>2</sub>.

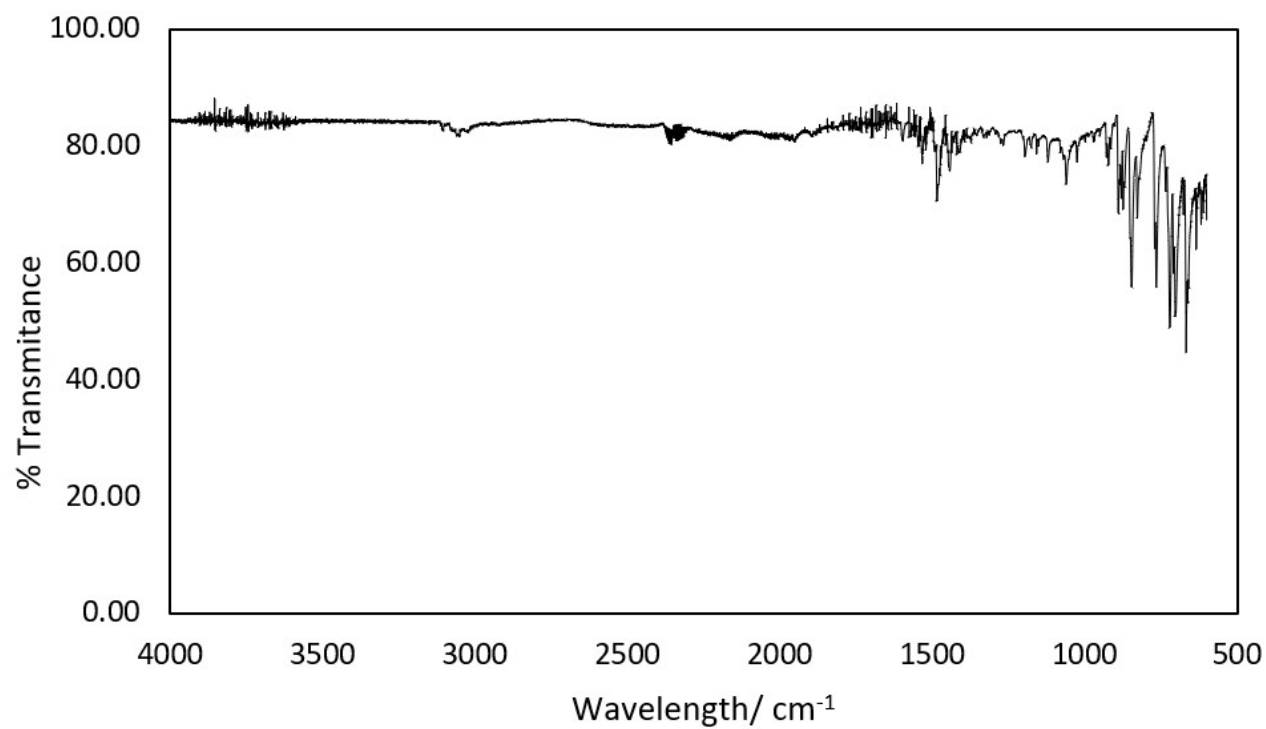

**Figure S45** IR spectra of **Th-BTZ-oPh<sub>2</sub>**.

## 7. References

- 1 C. M. S. Jones, A. Gakamsky and J. Marques-Hueso, *Sci. Technol. Adv. Mater.*, 2021, **22**, 810–848.
- 2 O. V. Dolomanov, L. J. Bourhis, R. J. Gildea, J. A. K. Howard and H. Puschmann, *J. Appl. Crystallogr.*, 2009, **42**, 339–341.
- 3 G. M. Sheldrick, *Acta Crystallogr. Sect. A Found. Crystallogr.*, 2015, **71**, 3–8.
- 4 G. M. Sheldrick, *Acta Crystallogr. Sect. C Struct. Chem.*, 2015, **71**, 3–8.
- 5 M. Ranger, D. Rondeau and M. Leclerc, *Macromolecules*, 1997, **30**, 7686–7691.
- 6 J. P. Heiskanen, P. Vivo, N. M. Saari, T. I. Hukka, T. Kastinen, K. Kaunisto, H. J. Lemmetyinen and O. E. O. Hormi, *J. Org. Chem.*, 2016, **81**, 1535–1546.
- 7 D. Taylor, T. Malcomson, A. Zhakeyev, S.-X. Cheng, G. M. Rosair, J. Marques-Hueso, Z. Xu, M. J. Paterson, S. J. Dalgarno and F. Vilela, *Org. Chem. Front.*, 2022, **9**, 5473–5484.
- 8 S. Dhar, D. K. Rana, S. S. Roy, S. Roy, S. Bhattacharya and S. C. Bhattacharya, *J. Lumin.*, 2012, **132**, 957–964.
- 9 M. J. Frisch, G. W. Trucks, H. B. Schlegel, G. E. Scuseria, M. A. Robb, J. R. Cheeseman, G. Scalmani, V. Barone, G. A. Petersson, H. Nakatsuji, X. Li, M. Caricato, A. V. Marenich, J. Bloino, B. G. Janesko, R. Gomperts, B. Mennucci, H. P. Hratchian, J. V. Ortiz, A. F. Izmaylov, J. L. Sonnenberg, D. Williams-Young, F. Ding, F. Lipparini, F. Egidi, J. Goings, B. Peng, A. Petrone, T. Henderson, D. Ranasinghe, V. G. Zakrzewski, J. Gao, N. Rega, G. Zheng, W. Liang, M. Hada, M. Ehara, K. Toyota, R. Fukuda, J. Hasegawa, M. Ishida, T. Nakajima, Y. Honda, O. Kitao, H. Nakai, T. Vreven, K. Throssell, J. A. Montgomery, Jr., J. E. Peralta, F. Ogliaro, M. J. Bearpark, J. J. Heyd, E. N. Brothers, K. N. Kudin, V. N. Staroverov, T. A. Keith, R. Kobayashi, J. Normand, K. Raghavachari, A. P. Rendell, J. C. Burant, S. S. Iyengar, J. Tomasi, M. Cossi, J. M. Millam, M. Klene, C. Adamo, R. Cammi, J. W. Ochterski, R. L. Martin, K. Morokuma, O. Farkas, J. B. Foresman, and D. J. Fox, Gaussian 16, Revision A.03, Inc., Wallingford CT, 2016.
- 10 R. Dennington, T. A. Keith and J. M. Millam, GaussView Version 6, Semichem Inc., Shawnee Mission KS, 2016.
- 11 B. Miehlich, A. Savin, H. Stoll and H. Preuss, *Chem. Phys. Lett.*, 1989, **157**, 200–206.
- 12 C. Lee, W. Yang and R. G. Parr, *Phys. Rev. B*, 1988, **37**, 785–789.
- 13 A. D. Becke, *J. Chem. Phys.*, 1993, **98**, 1372–1377.
- 14 A. D. Becke, *Phys. Rev. A*, 1988, **38**, 3098–3100.
- 15 R. Krishnan, J. S. Binkley, R. Seeger and J. A. Pople, *J. Chem. Phys.*, 1980, **72**, 650–654.
- 16 T. H. Dunning, *J. Chem. Phys.*, 1989, **90**, 1007–1023.
- 17 A. V. Marenich, C. J. Cramer and D. G. Truhlar, *J. Phys. Chem. B*, 2009, **113**, 6378–6396.
- 18 T. Yanai, D. P. Tew and N. C. Handy, *Chem. Phys. Lett.*, 2004, **393**, 51–57.
- 19 T. Malcomson and M. J. Paterson, *Photochem. Photobiol. Sci.*, 2020, **19**, 1538–1547.
- 20 M. J. Paterson, O. Christiansen, F. Pawłowski, P. Jørgensen, C. Hättig, T. Helgaker and P. Sałek, *J. Chem. Phys.*, 2006, **124**, 054322.

- 21 J. Arnbjerg, M. J. Paterson, C. B. Nielsen, M. Jørgensen, O. Christiansen and P. R. Ogilby, *J. Phys. Chem. A*, 2007, **111**, 5756–5767.
- 22 M. Johnsen, M. J. Paterson, J. Arnbjerg, O. Christiansen, C. B. Nielsen, M. Jørgensen and P. R. Ogilby, *Phys. Chem. Chem. Phys.*, 2008, **10**, 1177–1191.
- 23 L. Therese Bergendahl and M. J. Paterson, *Chem. Commun.*, 2012, **48**, 1544–1546.
- 24 S. I. Kato, T. Matsumoto, M. Shigeiwa, H. Gorohmaru, S. Maeda, T. Ishi-i and S. Mataka, *Chem. - A Eur. J.*, 2006, **12**, 2303–2317.
- 25 C. B. Nielsen, A. J. P. White and I. McCulloch, *J. Org. Chem.*, 2015, **80**, 5045–5048.
